# Supplementary material for: Molecular phenotyping and image-guided surgical treatment of melanoma using spectrally distinct ultrasmall core-shell silica nanoparticles
Source: PubMed Central journal article supplement — Sci Adv. 2019 Dec 4;5(12):eaax5208. doi: 10.1126/sciadv.aax5208 (PMC6892625; doi:10.1126/sciadv.aax5208), 2019-12-04
Supplement: aax5208_SM.pdf [file aax5208_SM.pdf]

## Supplementary Materials for

### Molecular phenotyping and image-guided surgical treatment of melanoma using spectrally distinct ultrasmall core-shell silica nanoparticles

Feng Chen, Brian Madajewski, Kai Ma, Daniella Karassawa Zanoni, Hilda Stambuk, Melik Z. Turker, Sébastien Monette, Li Zhang, Barney Yoo, Peiming Chen, Richard J. C. Meester, Sander de Jonge, Pablo Montero, Evan Phillips, Thomas P. Quinn, Mithat Gönen, Sonia Sequeira, Elisa de Stanchina, Pat Zanzonico, Ulrich Wiesner\*, Snehal G. Patel\*, Michelle S. Bradbury\*

\*Corresponding author. Email: bradburm@mskcc.org (M.S.B.); ubw1@cornell.edu (U.W.); patels@mskcc.org (S.G.P.)

Published 4 December 2019, *Sci. Adv.* **5**, eaax5208 (2019)  
DOI: 10.1126/sciadv.aax5208

#### The PDF file includes:

- Fig. S1. Clinical trial SLN mapping case in a patient with head and neck melanoma using cRGDY-Cy5.5-PEG-C' dots (NCT02106598).
- Fig. S2. Development of 700- and 800-nm emitting NIR fluorescent C' dots.
- Fig. S3. Morphology and purity characterization of  $\alpha$ MSH-PEG-Cy5.5-C' dots and cRGDY-PEG-CW800-C' dots.
- Fig. S4. The relationship between probe concentration and signal intensity of different probes.
- Fig. S5. The bleed-through of  $\alpha$ MSH-PEG-Cy5.5-C' dot probes to the 800-nm channel under the excitation of a 700-nm laser (particle concentration range, 0 to 125 nM).
- Fig. S6. The bleed-through of cRGDY-PEG-CW800-C' dot probes to the 700-nm channel under the excitation of a 800-nm laser (concentration range, 0 to 250 nM).
- Fig. S7. The bleed-through of cocktail C' dots ( $\alpha$ MSH-PEG-Cy5.5-C' dot probes and cRGDY-PEG-CW800-C' dot) probes to the 700- or 800-nm channels under the combined excitation of 700- and 800-nm lasers (concentration range, 0 to 250 nM).
- Fig. S8. Summary of MIP PET images of all seven spontaneous melanoma miniswines (the related MIP short videos are also provided as movies S1 to S7).
- Fig. S9. The marking of the expected SLN locations.
- Fig. S10. A representative example of multiplexing optical data analysis using the software (Architector Image Viewer, version 1.9.0) from Quest Spectrum.
- Fig. S11. Whole-body PET/CT imaging of pig #1.
- Fig. S12. Whole-body PET/CT imaging and histological analysis of pig #2.
- Fig. S13. Whole-body PET/CT imaging and histological analysis of pig #3.
- Fig. S14. Whole-body PET/CT imaging and histological analysis of pig #4.
- Fig. S15. Whole-body PET/CT imaging and histological analysis of pig #6.
- Fig. S16. Whole-body PET/CT imaging and histological analysis of pig #7.
- Fig. S17. IVIS imaging to identify nanoparticles at the tumor site.

Fig. S18. Average body weight of all male mice from the microdose toxicology study.

Fig. S19. Average body weight of all female mice from the microdose toxicology study.

Table S1. Optimization of 800-nm emitted NIR fluorescent C' dots.

Table S2. In vivo signal intensity and bleed-through percentage of cocktail C' dots excited with a 700-nm laser.

Table S3. Summary of the injection information of all seven spontaneous melanoma miniswines.

Table S4. Summary of PET SUV numbers of all nodes from seven spontaneous melanoma miniswines (~0.5-mm tumor burden was highlighted in green; NA means tumor burden diameter was not available).

Table S5. Microdose toxicology study animal group.

Table S6. Mortality and morbidity summary table of the microdose toxicology study.

Table S7. Hematology parameters in the microdose toxicology study.

Table S8. Clinical chemistry parameters in the microdose toxicology study.

Table S9. Tissues examined microscopically in the microdose toxicology study.

Table S10. Hematology parameters, group 5, male, tumor, vehicle control (saline), day 2.

Table S11. Hematology parameters, group 6, female, tumor, vehicle control (saline), day 2.

Table S12. Hematology parameters, group 7, male, tumor, test article  $\alpha$ MSH-PEG-Cy5.5-C' dots at 1.2 nmol, day 2.

Table S13. Hematology parameters, group 8, female, tumor, test article  $\alpha$ MSH-PEG-Cy5.5-C' dots at 1.2 nmol, day 2.

Table S14. Hematology parameters, group 9, male, tumor, test article cRGDY-PEG-cw800-C' dots at 1.2 nmol, day 2.

Table S15. Hematology parameters, group 10, female, tumor, test article cRGDY-PEG-cw800-C' dots at 1.2 nmol, day 2.

Table S16. Hematology parameters, group 11, male, no tumor, test article  $\alpha$ MSH-PEG-Cy5.5-C' dots at 1.2 nmol, day 2.

Table S17. Hematology parameters, group 12, female, no tumor, test article  $\alpha$ MSH-PEG-Cy5.5-C' dots at 1.2 nmol, day 2.

Table S18. Hematology parameters, group 13, male, no tumor, test article cRGDY-PEG-cw800-C' dots at 1.2 nmol, day 2.

Table S19. Hematology parameters, group 14, female, no tumor, test article cRGDY-PEG-cw800-C' dots at 1.2 nmol, day 2.

Table S20. Hematology parameters, group 15, male, tumor, vehicle control (saline), day 14.

Table S21. Hematology parameters, group 16, female, tumor, vehicle control (saline), day 14.

Table S22. Hematology parameters, group 17, male, tumor, test article  $\alpha$ MSH-PEG-Cy5.5-C' dots at 1.2 nmol, day 14.

Table S23. Hematology parameters, group 18, female, tumor, test article  $\alpha$ MSH-PEG-Cy5.5-C' dots at 1.2 nmol, day 14.

Table S24. Hematology parameters, group 19, male, tumor, test article cRGDY-PEG-cw800-C' dots at 1.2 nmol, day 14.

Table S25. Hematology parameters, group 20, female, tumor, test article cRGDY-PEG-cw800-C' dots at 1.2 nmol, day 14.

Table S26. Hematology parameters, group 21, male, no tumor, test article  $\alpha$ MSH-PEG-Cy5.5-C' dots at 1.2 nmol, day 14.

Table S27. Hematology parameters, group 22, female, no tumor, test article  $\alpha$ MSH-PEG-Cy5.5-C' dots at 1.2 nmol, day 14.

Table S28. Hematology parameters, group 23, male, no tumor, test article  $\alpha$ MSH-PEG-Cy5.5-C' dots at 1.2 nmol, day 14.

Table S29. Hematology parameters, group 24, female, no tumor, test article  $\alpha$ MSH-PEG-Cy5.5-C' dots at 1.2 nmol, day 14.

Table S30. Hematology parameters, group 5, male, tumor, vehicle control (saline), day 2.

Table S31. Hematology parameters, group 6, female, tumor, vehicle control (saline), day 2.

Table S32. Hematology parameters, group 7, male, tumor, test article  $\alpha$ MSH-PEG-Cy5.5-C' dots at 1.2 nmol, day 2.

Table S33. Hematology parameters, group 8, female, tumor, test article  $\alpha$ MSH-PEG-Cy5.5-C' dots at 1.2 nmol, day 2.

Table S34. Hematology parameters, group 9, male, tumor, test article cRGDY-PEG-cw800-C' dots at 1.2 nmol, day 2.

Table S35. Hematology parameters, group 10, female, tumor, test article cRGDY-PEG-cw800-C' dots at 1.2 nmol, day 2.

Table S36. Hematology parameters, group 11, male, no tumor, test article  $\alpha$ MSH-PEG-Cy5.5-C' dots at 1.2 nmol, day 2.

Table S37. Hematology parameters, group 12, female, no tumor, test article  $\alpha$ MSH-PEG-Cy5.5-C' dots at 1.2 nmol, day 2.

Table S38. Hematology parameters, group 13, male, no tumor, test article cRGDY-PEG-cw800-C' dots at 1.2 nmol, day 2.

Table S39. Hematology parameters, group 14, female, no tumor, test article cRGDY-PEG-cw800-C' dots at 1.2 nmol, day 2.

Table S40. Hematology parameters, group 15, male, tumor, vehicle control (saline), day 14.

Table S41. Hematology parameters, group 16, female, tumor, vehicle control (saline), day 14.

Table S42. Hematology parameters, group 17, male, tumor, test article  $\alpha$ MSH-PEG-Cy5.5-C' dots at 1.2 nmol, day 14.

Table S43. Hematology parameters, group 18, female, tumor, test article  $\alpha$ MSH-PEG-Cy5.5-C' dots at 1.2 nmol, day 14.

Table S44. Hematology parameters, group 19, male, tumor, test article cRGDY-PEG-cw800-C' dots at 1.2 nmol, day 14.

Table S45. Hematology parameters, group 20, female, tumor, test article cRGDY-PEG-cw800-C' dots at 1.2 nmol, day 14.

Table S46. Hematology parameters, group 21, male, no tumor, test article  $\alpha$ MSH-PEG-Cy5.5-C' dots at 1.2 nmol, day 14.

Table S47. Hematology parameters, group 22, female, no tumor, test article  $\alpha$ MSH-PEG-Cy5.5-C' dots at 1.2 nmol, day 14.

Table S48. Hematology parameters, group 23, male, no tumor, test article  $\alpha$ MSH-PEG-Cy5.5-C' dots at 1.2 nmol, day 14.

Table S49. Hematology parameters, group 24, female, no tumor, test article  $\alpha$ MSH-PEG-Cy5.5-C' dots at 1.2 nmol, day 14.

**Other Supplementary Material for this manuscript includes the following:**

(available at [advances.sciencemag.org/cgi/content/full/5/12/eaax5208/DC1](http://advances.sciencemag.org/cgi/content/full/5/12/eaax5208/DC1))

Movie S1 (.mov format). MIP video of pig #1.  
Movie S2 (.mov format). MIP video of pig #2.  
Movie S3 (.mov format). MIP video of pig #3.  
Movie S4 (.mov format). MIP video of pig #4.  
Movie S5 (.mov format). MIP video of pig #5.  
Movie S6 (.mov format). MIP video of pig #6.

Movie S7 (.mov format). MIP video of pig #7.

Movie S8 (.mp4 format). Image-guided multiplexing, pig #5.

Movie S9 (.mov format). Image-guided multiplexing, pig #3.



## 1. SUPPLEMENTARY FIGURES

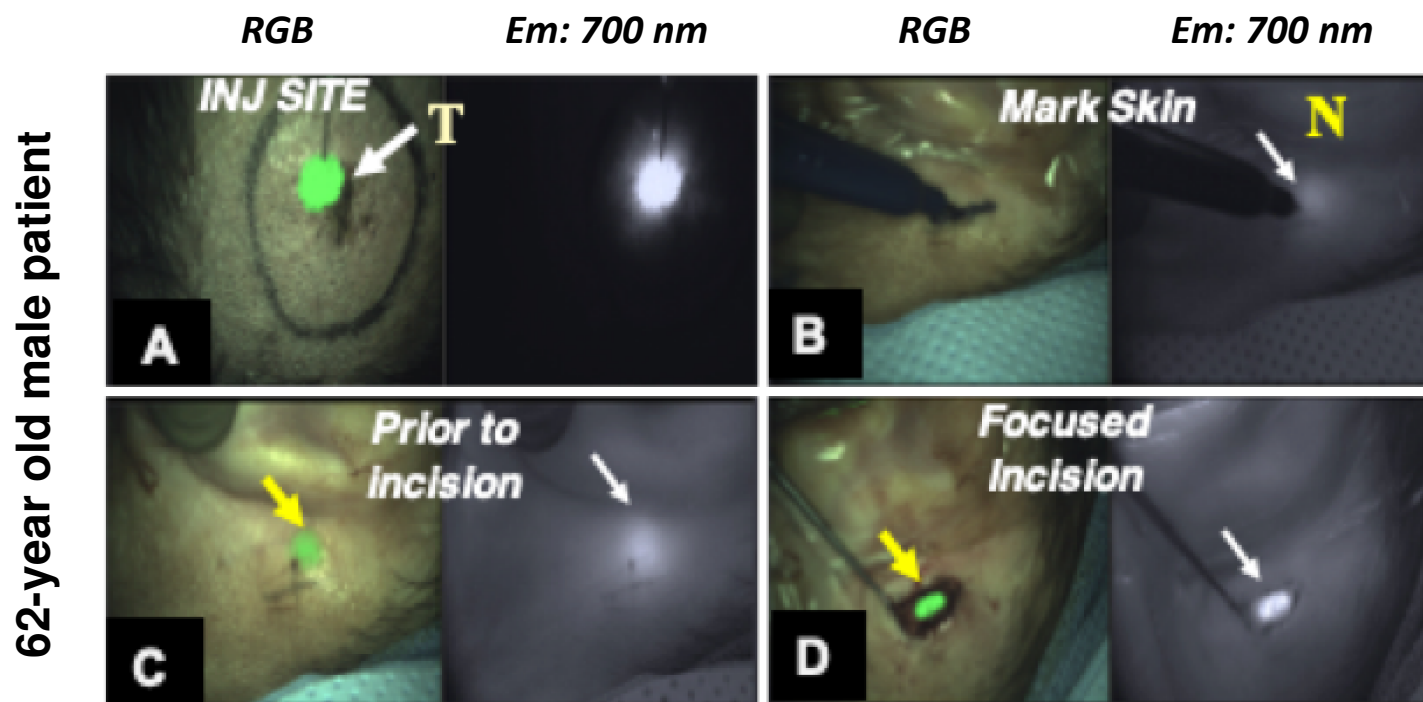

**Fig. S1. Clinical trial SLN mapping case in a patient with head and neck melanoma using cRGDY-Cy5.5-PEG-C' dots (NCT02106598).** The results showed a 62-year old male patient with a scalp melanoma (**T**) and fluorescence signal (arrows) overlying the site of a metastatic post-auricular SLN (**N**) through the intact skin. The patient was injected peritumorally with a single injection of ultrabright cRGDY-PEG-Cy5.5-C' dots about a primary lesion (**T**) of the scalp (**A**). Focal fluorescence was seen through the intact skin overlying the post-auricular SLNs (**N**) in the surgical suite using real-time optical imaging guidance of Quest Spectrum® camera system (**B&C**). This approach allows the operating surgeon to limit the extent of surgical dissection (short black line in **B**) and the subsequent size of the resection cavity, in addition to accurately identifying the metastatic SLN in real-time (**D**). (Photo Credit: Snehal G. Patel, Memorial Sloan Kettering Cancer Center).

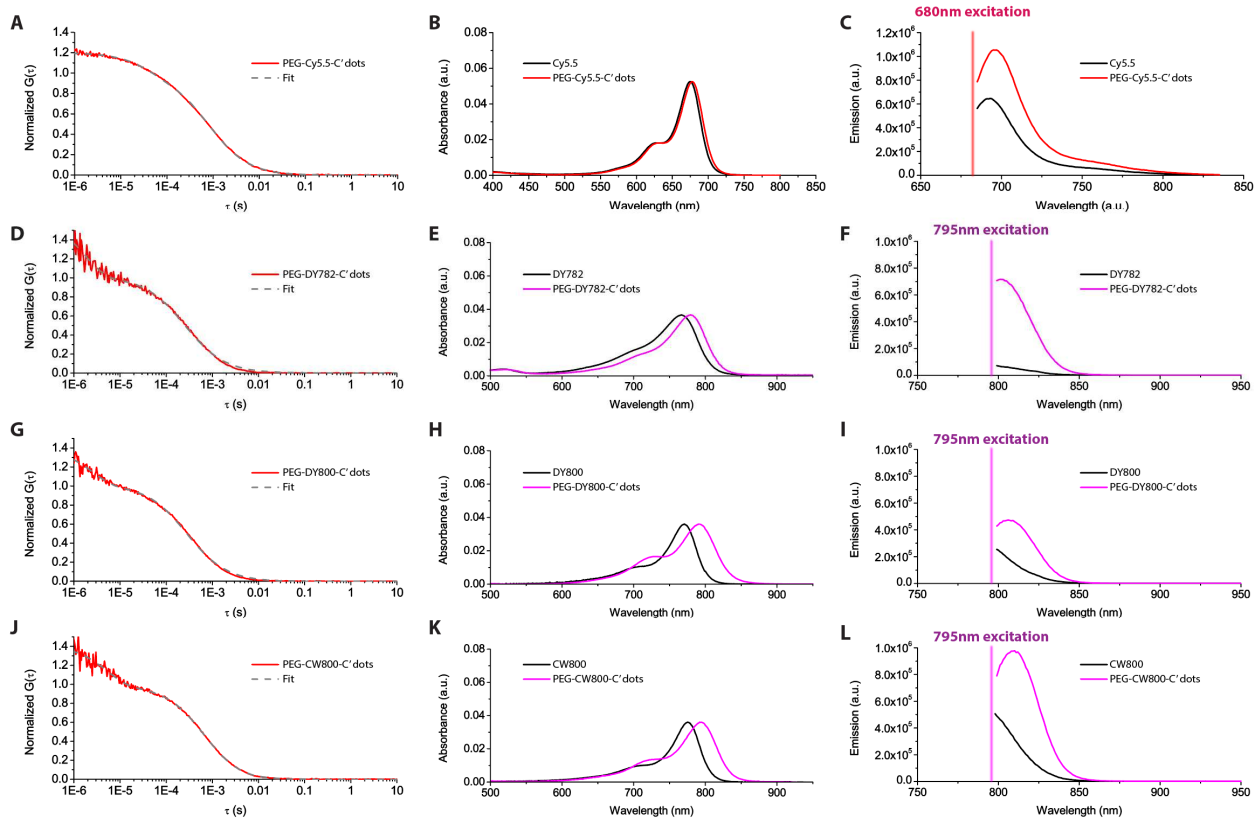

**Fig. S2. Development of 700- and 800-nm emitting NIR fluorescent C' dots.** (A to C) FCS correlation curve with fit (A), UV-Vis absorbance comparison to free dye (B), and emission spectrum comparison to free dye (C) of PEG-Cy5.5-C' dots. (D to F) FCS correlation curve with fit (D), UV-Vis absorbance comparison to free dye (E), and emission spectrum comparison to free dye (F) of PEG-DY782-C' dots. (G to I) FCS correlation curve with fit (G), UV-Vis absorbance comparison to free dye (H), and emission spectrum comparison to free dye (I) of PEG-DY800-C' dots. (J to L) FCS correlation curve with fit (J), UV-Vis absorbance comparison to free dye (K), and emission spectrum comparison to free dye (L) of PEG-CW800-C' dots. The maximum intensity of the absorbance of different samples was matched by adjusting sample concentration (B, E, H, and K) before the measurement of emission spectra under the excitation conditions mimicking the camera system (C, F, I, and L). The area under curve of individual emission spectra over the range of wavelengths corresponding to the two NIR windows of the camera system was determined (C, F, I and L) in order to estimate the fluorescence brightness detectable by the camera system (table S1). (Photo Credit: Kai Ma, Cornell University).

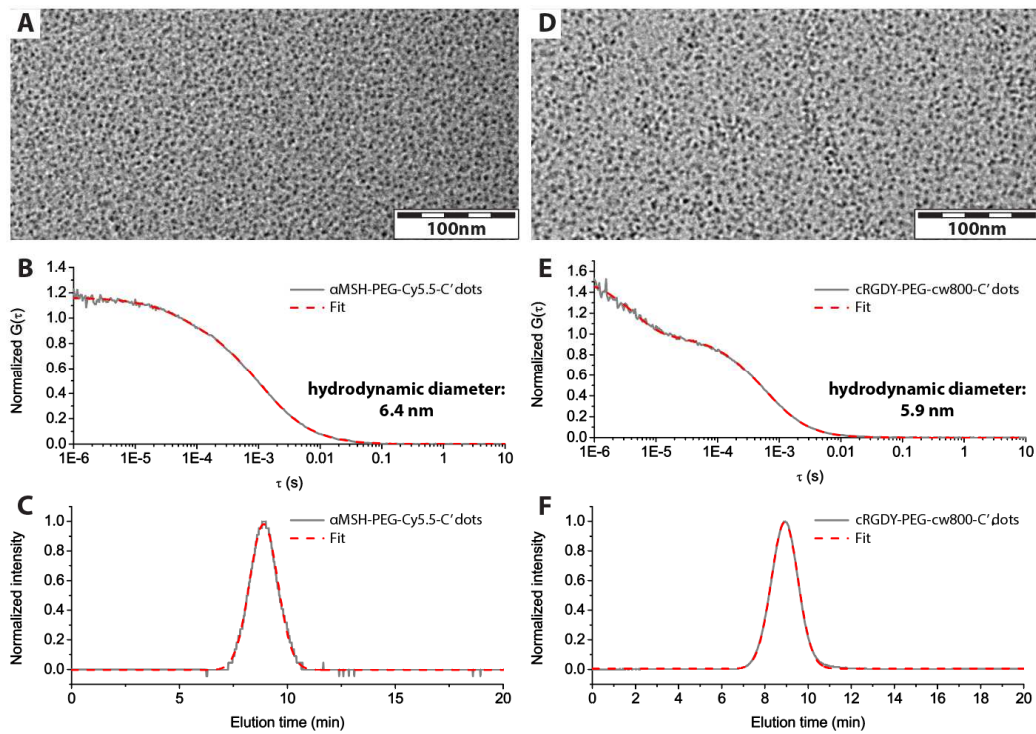

**Fig. S3. Morphology and purity characterization of  $\alpha$ MSH-PEG-Cy5.5-C' dots and cRGDY-PEG-CW800-C' dots.** (A to C) Representative TEM image (A), FCS correlation curve with fit (B), and GPC elugram with fit (C) of  $\alpha$ MSH-PEG-Cy5.5-C' dots. (D to F) Representative TEM image (A), FCS correlation curve with fit (B), and GPC elugram with fit (C) of cRGDY-PEG-CW800-C' dots. (Photo Credit: Kai Ma, Cornell University).

—●— Emission: 700 nm

—●— Emission: 800 nm

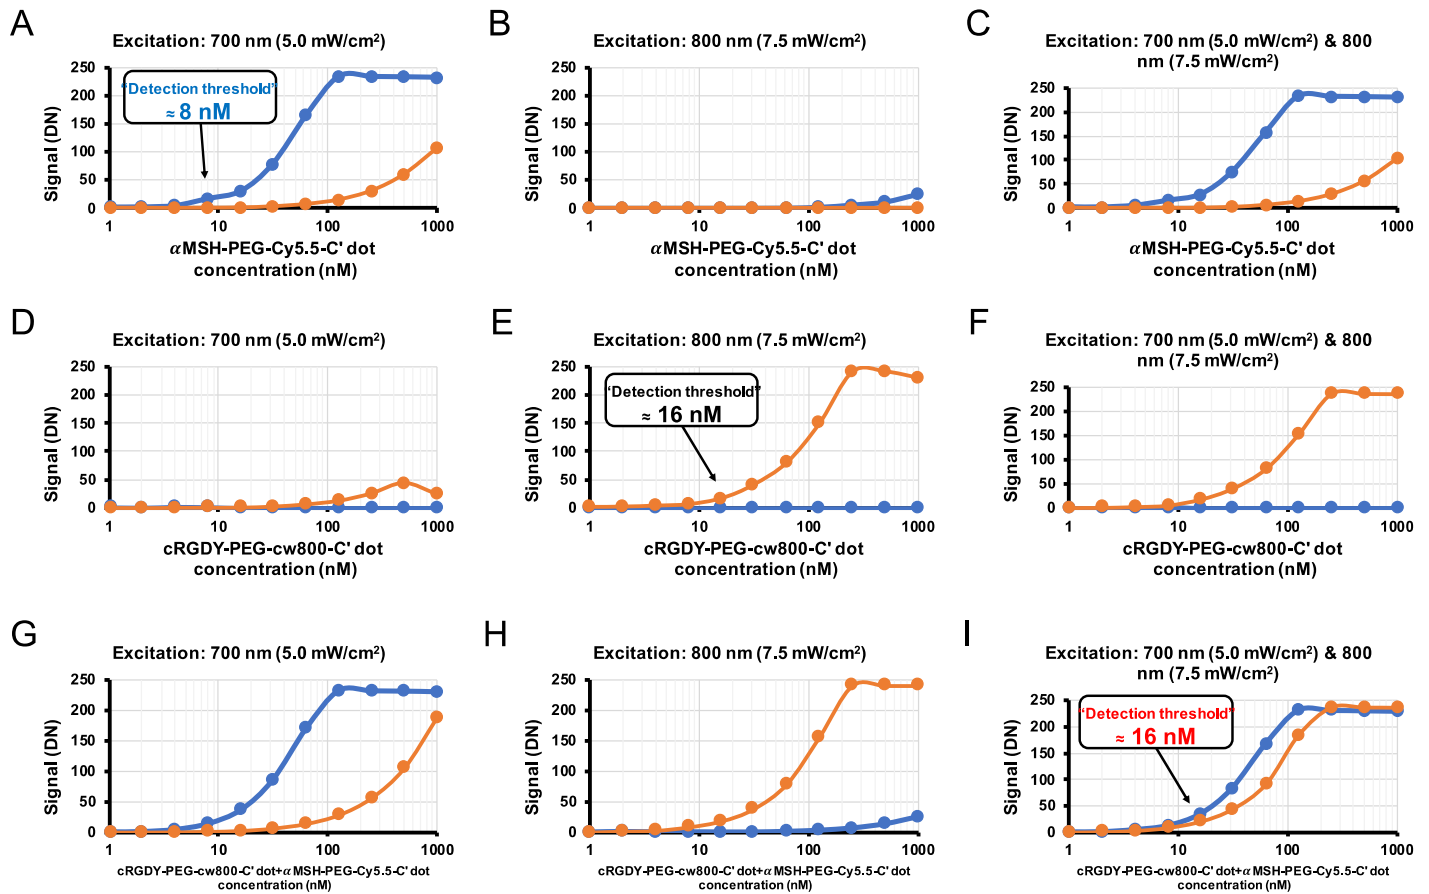

**Fig. S4. The relationship between probe concentration and signal intensity of different probes.** The relationship between probe concentration and signal intensity of different probes of (A-C)  $\alpha$ MSH-PEG-Cy5.5-C' dots, (D-F) cRGDY-PEG-CW800-C' dots, (G-I) mixed probes, under varied excitation conditions of 700-nm laser (A, D, G), 800-nm laser (B, E, H) and 700-nm+800-nm (C, F, I). (Photo Credit: Feng Chen, Memorial Sloan Kettering Cancer Center).

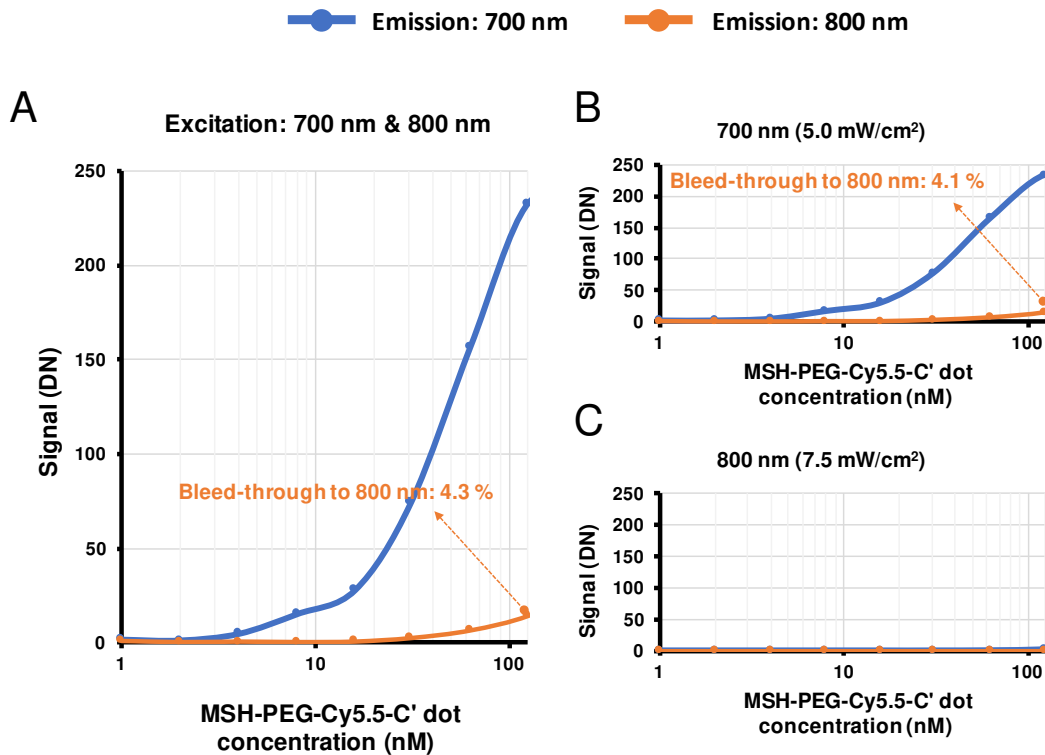

**Fig. S5. The bleed-through of  $\alpha$ MSH-PEG-Cy5.5-C' dot probes to the 800-nm channel under the excitation of a 700-nm laser (particle concentration range, 0 to 125 nM).** (Photo Credit: Feng Chen, Memorial Sloan Kettering Cancer Center).

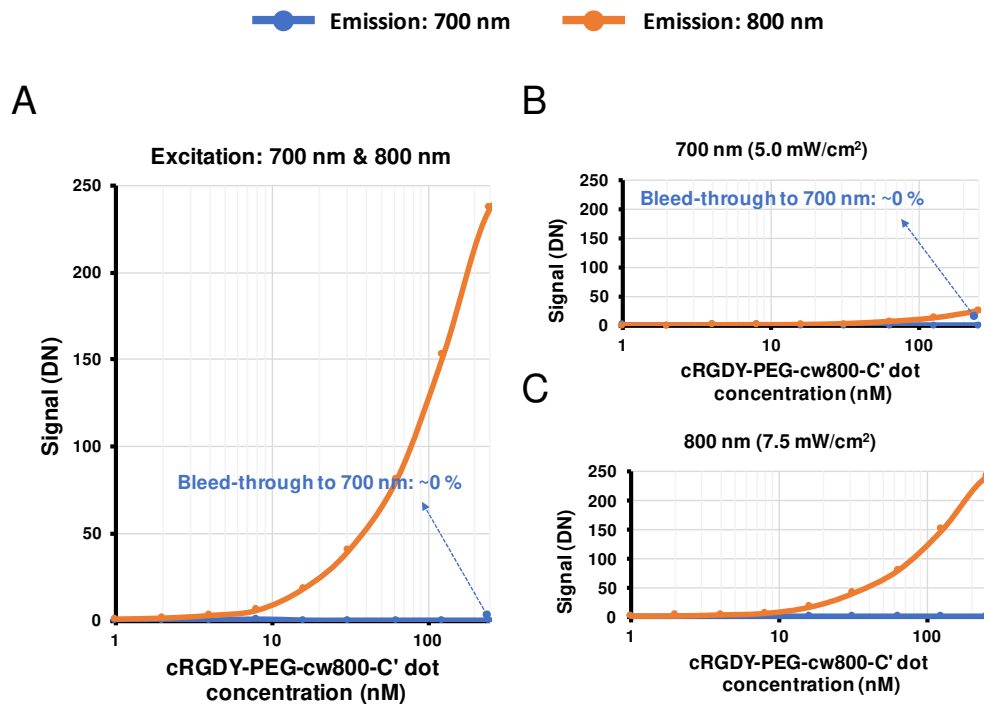

**Fig. S6. The bleed-through of cRGDY-PEG-cw800-C' dot probes to the 700-nm channel under the excitation of a 800-nm laser (concentration range, 0 to 250 nM).** (Photo Credit: Feng Chen, Memorial Sloan Kettering Cancer Center).

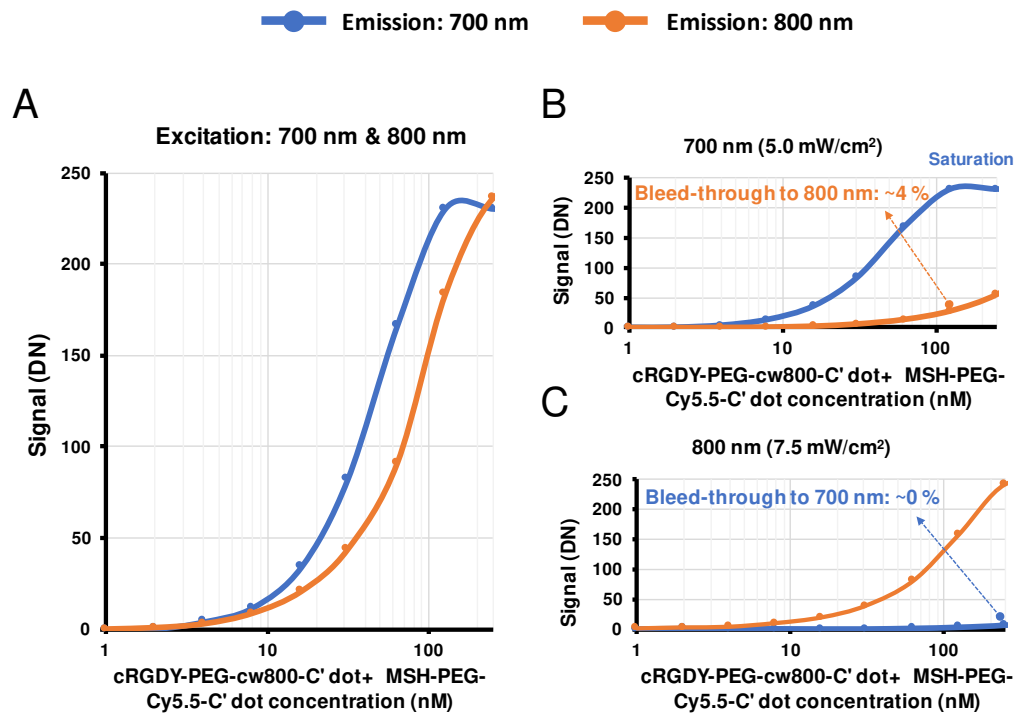

**Fig. S7. The bleed-through of cocktail C' dots ( $\alpha$ MSH-PEG-Cy5.5-C' dot probes and cRGDY-PEG-CW800-C' dot) probes to the 700- or 800-nm channels under the combined excitation of 700- and 800-nm lasers (concentration range, 0 to 250 nM). (Photo Credit: Feng Chen, Memorial Sloan Kettering Cancer Center).**

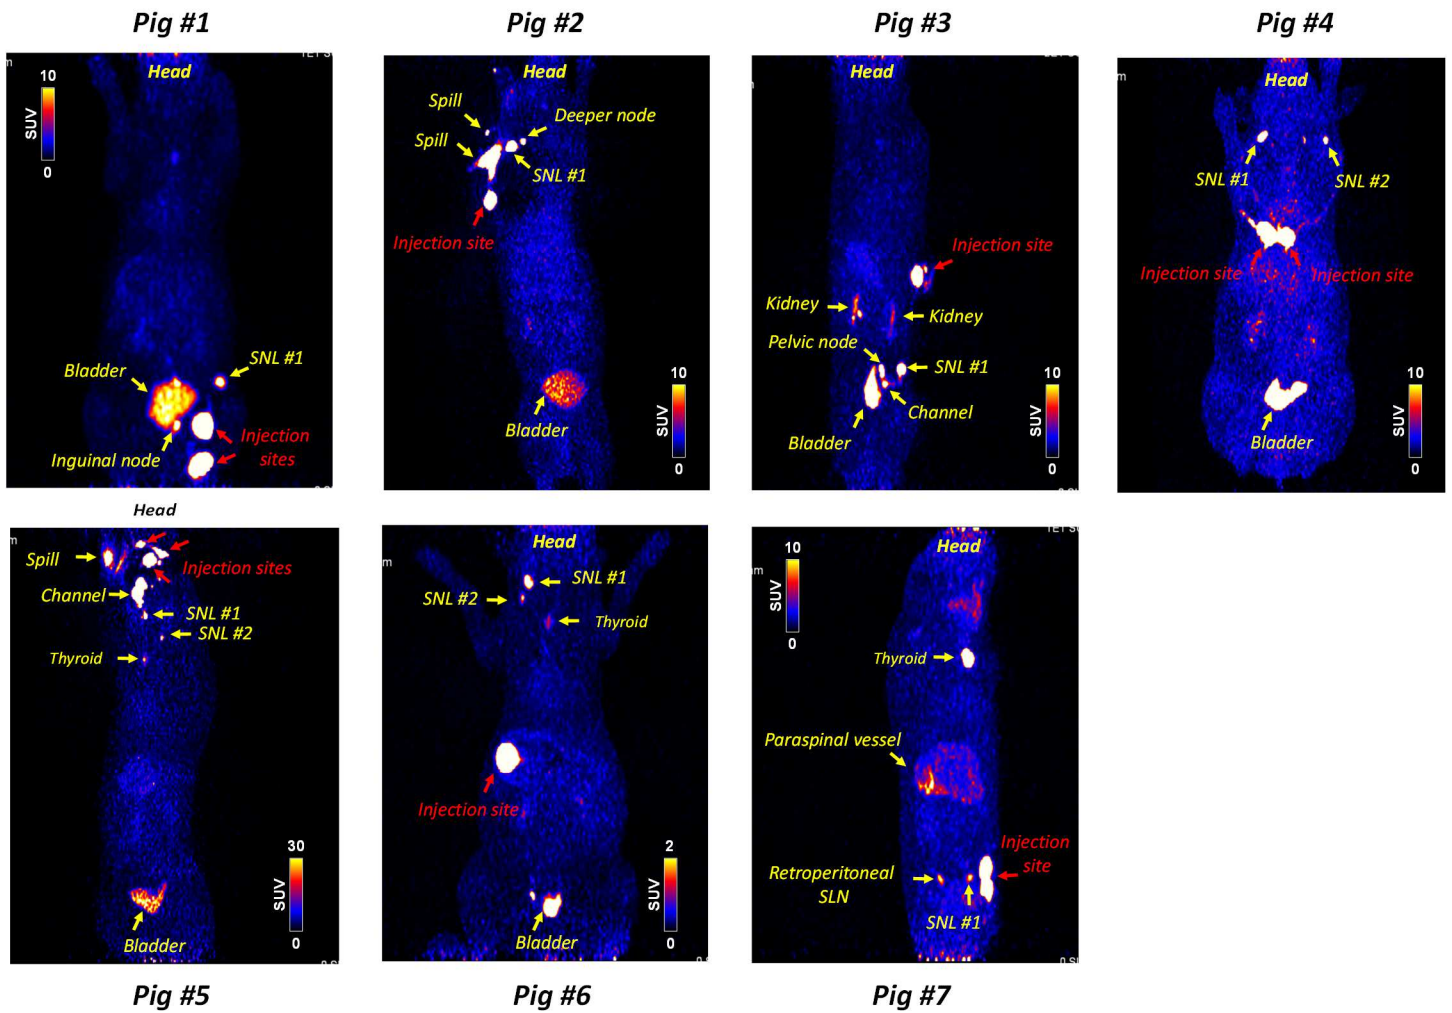

**Fig. S8. Summary of MIP PET images of all seven spontaneous melanoma miniswine (the related MIP short videos are also provided as movies S1 to S7).** (Photo Credit: Feng Chen, Memorial Sloan Kettering Cancer Center).



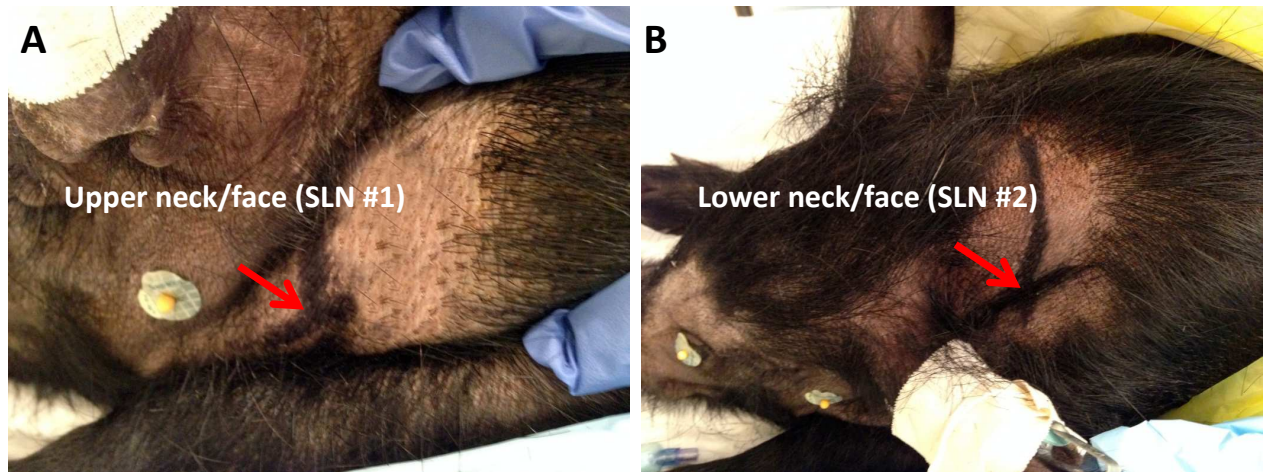

**Fig. S9. The marking of the expected SLN locations. (A) SLN #1, (B) SLN #2, based on the corresponding whole-body PET/CT imaging (shown in Figs. 4A, B). (Photo Credit: Hilda Stambuk, Memorial Sloan Kettering Cancer Center).**

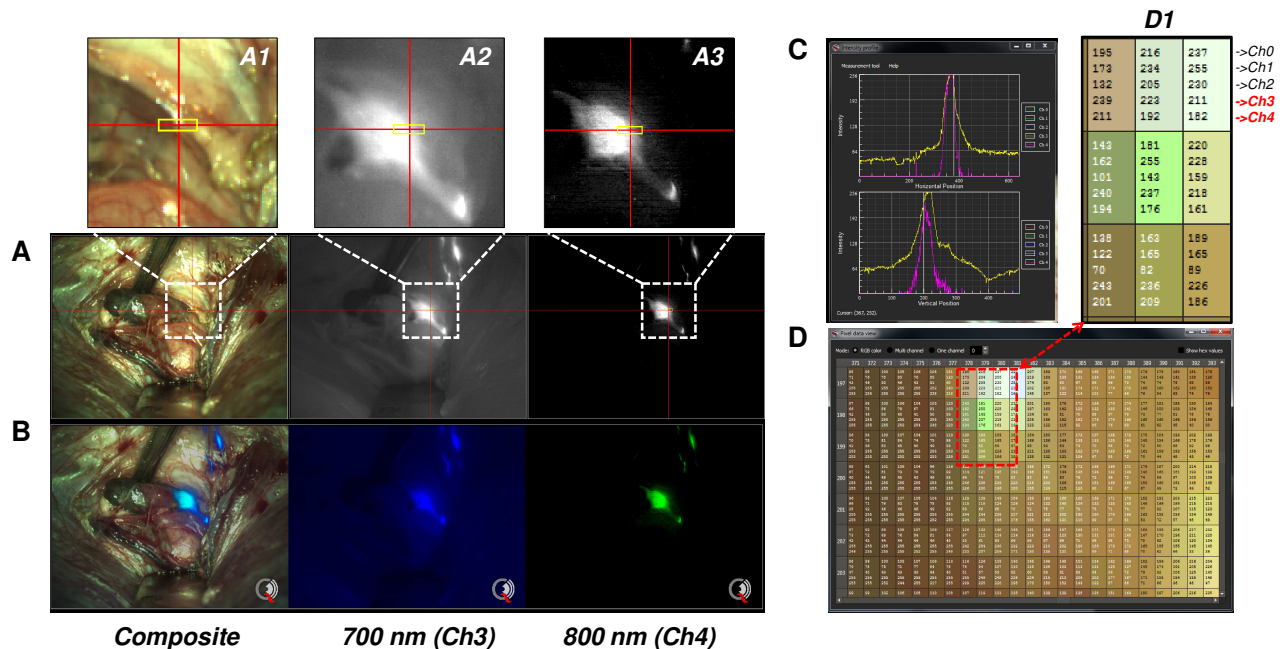

**Fig. S10. A representative example of multiplexing optical data analysis using the software (Architector Image Viewer, version 1.9.0) from Quest Spectrum. (A) From left to right, bright field image, grayscale 700-nm channel (Ch3) image, grayscale 800-nm channel (Ch4) image. A1-A3 images are corresponding enlarged areas in (A). (B) From left to right, composite image of two NIR fluorescence images of Cy5.5 and CW800, blue “pseudo-color” image of 700-nm channel, green “pseudo-color” image of 800-nm channel. (C) Optical signal intensity for each pixel from 700-nm (Ch3, yellow) and 800-nm (Ch4, pink) channels. For each channel (Ch3 and Ch4 separately) 6 values are used and averaged to derive a final intensity value (D) Pixel data of the highlighted area in (A). (Photo Credit: Snehal G. Patel, Michelle S. Bradbury, Memorial Sloan Kettering Cancer Center & Richard J. C. Meester, Quest Medical Imaging).**



## Pig #1

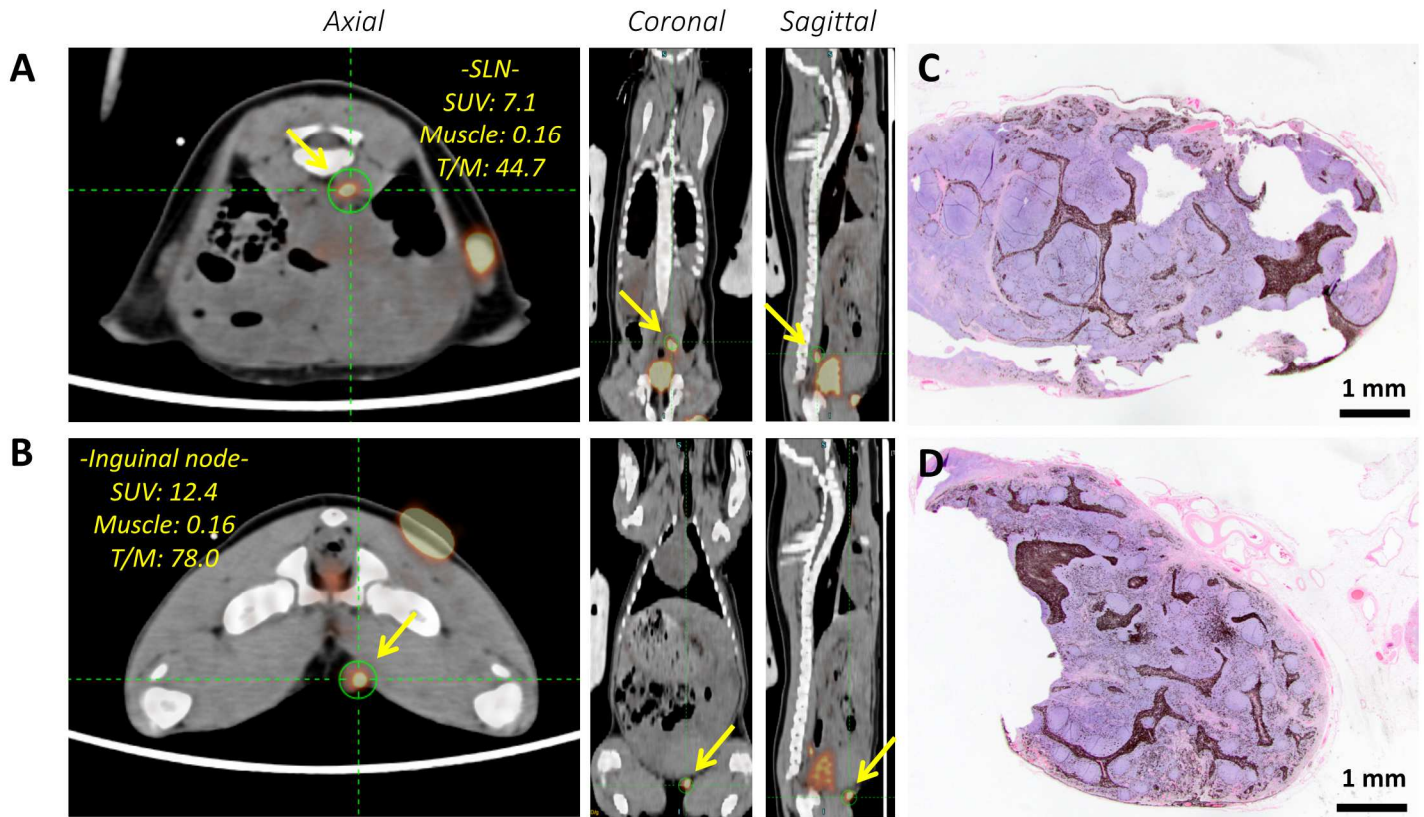

**Fig. S11. Whole-body PET/CT imaging of pig #1. (A) SNL, (B) Inguinal node.** Left: axial view. Middle: coronal view. Right: sagittal view. H&E staining of (C) SNL, and (D) Inguinal node. Scale bar: 1 mm. (Photo Credit: Feng Chen, Brian Madajewski & Sébastien Monette, Memorial Sloan Kettering Cancer Center).

## Pig #2

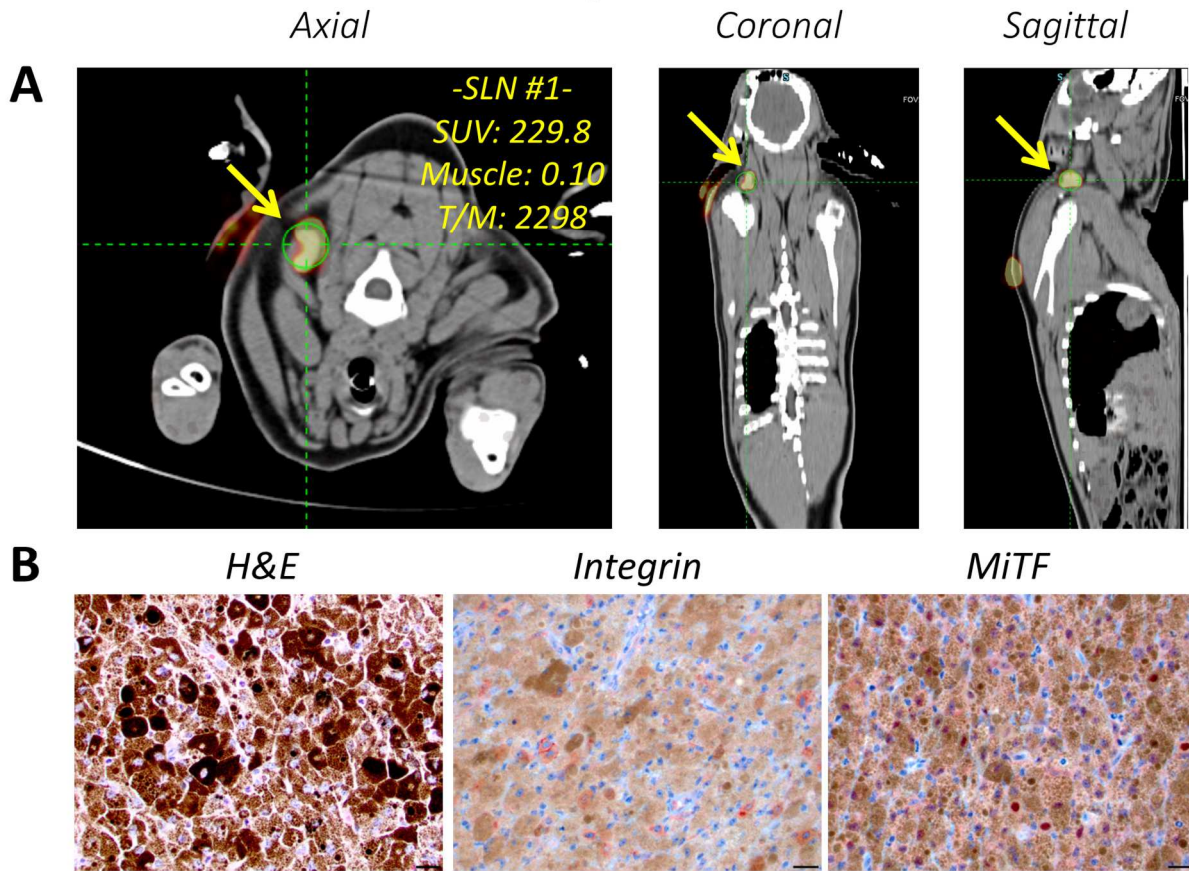

**Fig. S12. Whole-body PET/CT imaging and histological analysis of pig #2.** (A) Preoperative whole-body PET/CT imaging of spontaneous melanoma miniswine (pig #2). Left: axial view. Middle: coronal view. Right: sagittal view. (B) *Ex vivo* histological analysis of SLN #1. Left: H&E staining. Middle: integrin staining. Right: MiTF staining. Scale bar: 20  $\mu$ m. (Photo Credit: Feng Chen, Brian Madajewski & Sébastien Monette, Memorial Sloan Kettering Cancer Center).

### Pig #3

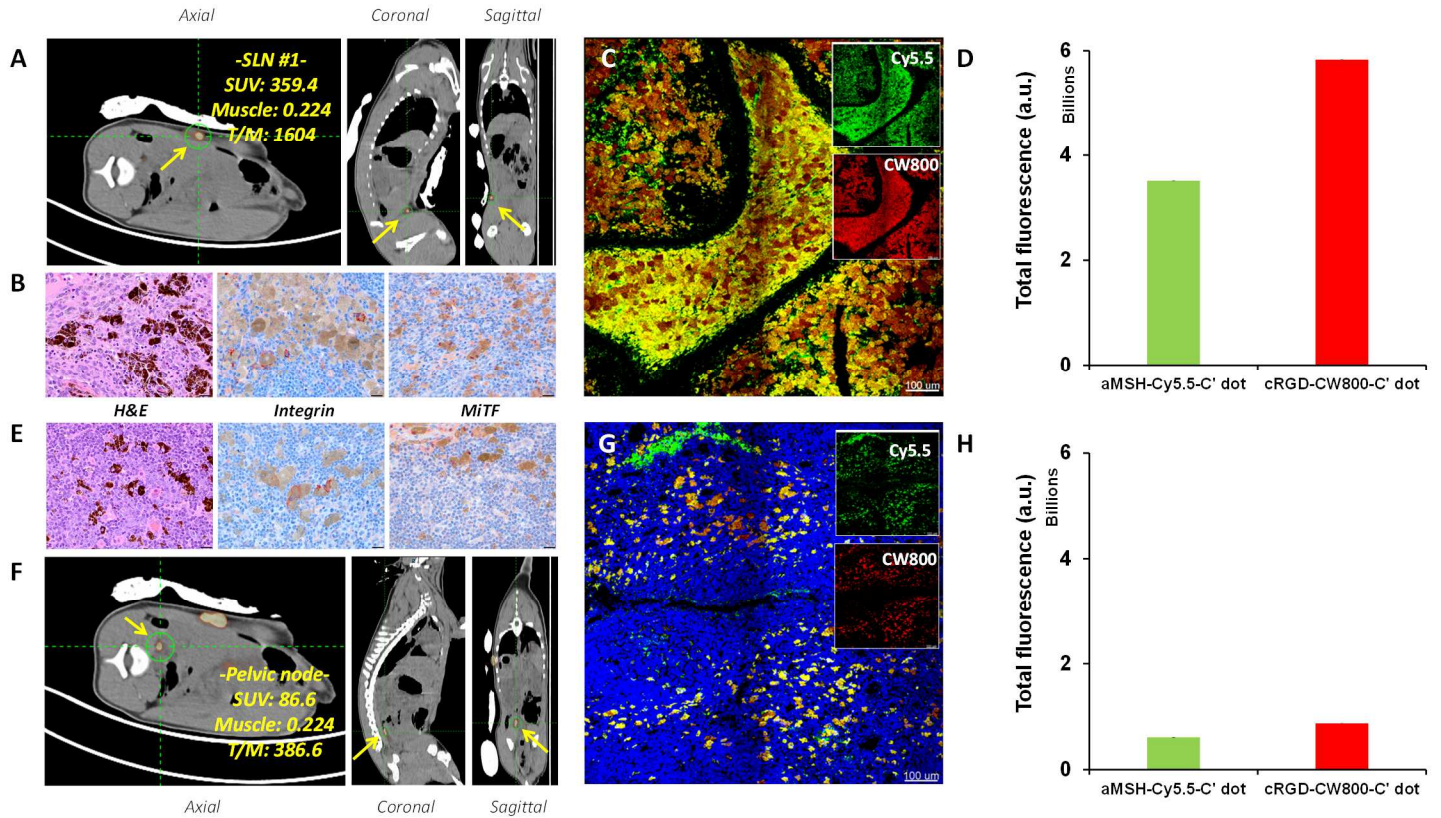

**Fig. S13. Whole-body PET/CT imaging and histological analysis of pig #3.** Preoperative whole-body PET/CT imaging of spontaneous melanoma miniswine (pig #3). (A) SLN #1, (F) pelvic node. Left: axial view. Middle: coronal view. Right: sagittal view. *Ex vivo* histological analysis of (B) SLN #1 and (E) pelvic node. Left: H&E staining. Middle: integrin staining. Right: MiTF staining. Scale bar: 20  $\mu$ m. High resolution confocal fluorescence microscopy of (C) SLN #1 and (G) pelvic node with DAPI nuclear stain (scale bar = 100  $\mu$ m). Inset shows the corresponding Cy5.5 and CW800 channels. Quantification of Cy5.5 and CW800 signals' total fluorescence intensities of (D) SLN #1 and (H) pelvic node. (Real-time video footage of pig #3 was also provided as **Video S9**). (Photo Credit: Feng Chen, Brian Madajewski & Sébastien Monette, Memorial Sloan Kettering Cancer Center).



## Pig #4

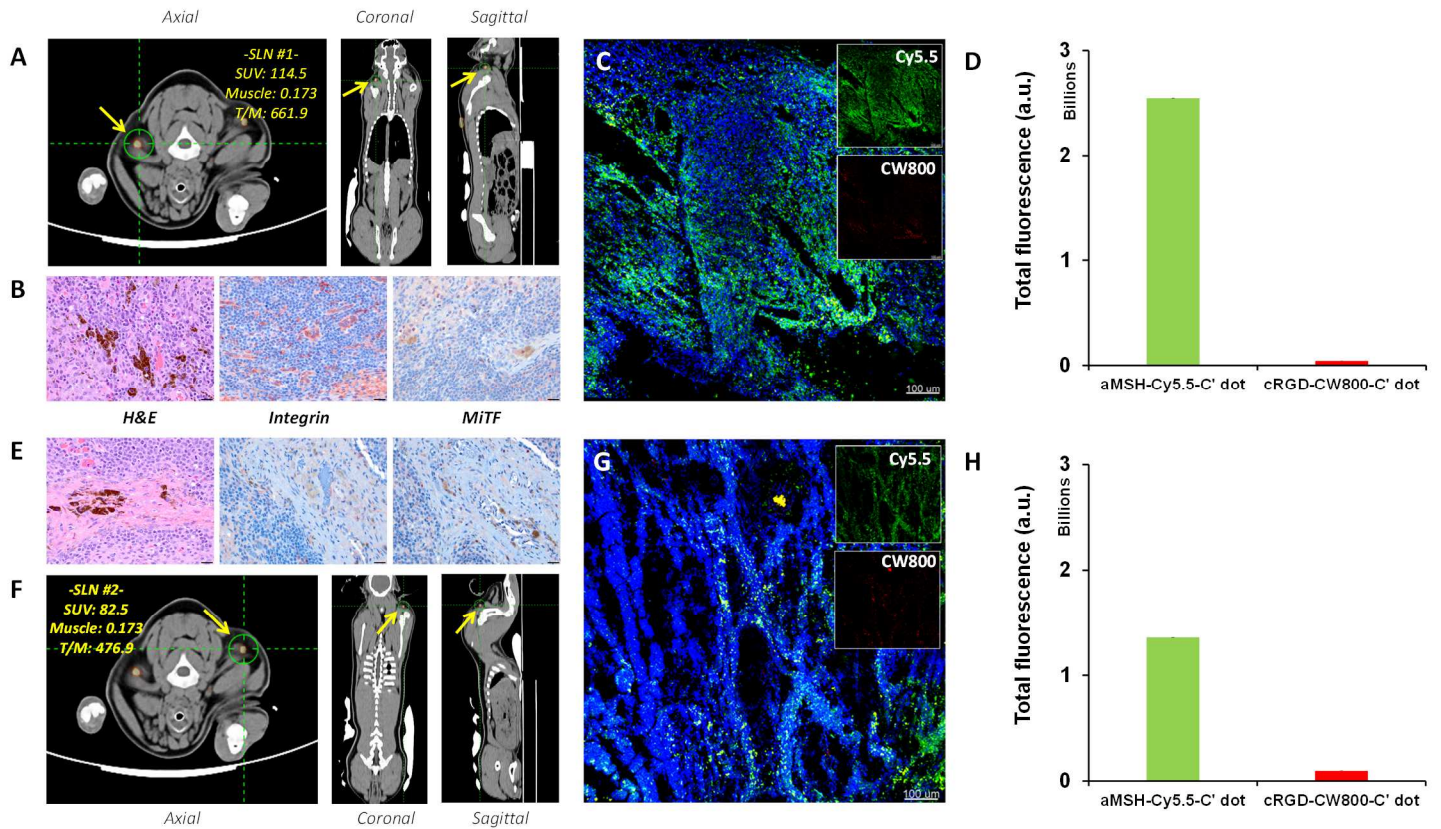

**Fig. S14. Whole-body PET/CT imaging and histological analysis of pig #4.** Preoperative whole-body PET/CT imaging of spontaneous melanoma miniswine (pig #4). (A) SLN #1, (F) SLN #2. Left: axial view. Middle: coronal view. Right: sagittal view. *Ex vivo* histological analysis of (B) SLN #1 and (E) SLN #2. Left: H&E staining. Middle: integrin staining. Right: MiTF staining. Scale bar: 20  $\mu\text{m}$ . High resolution confocal fluorescence microscopy of (C) SLN #1 and (G) SLN #2 with DAPI nuclear stain (scale bar = 100  $\mu\text{m}$ ). Inset shows the corresponding Cy5.5 and CW800 channels. Quantification of Cy5.5 and CW800 signals' total fluorescence intensities of (D) SLN #1 and (H) SLN #2. (Photo Credit: Feng Chen, Brian Madajewski & Sébastien Monette, Memorial Sloan Kettering Cancer Center).

**Pig #6**

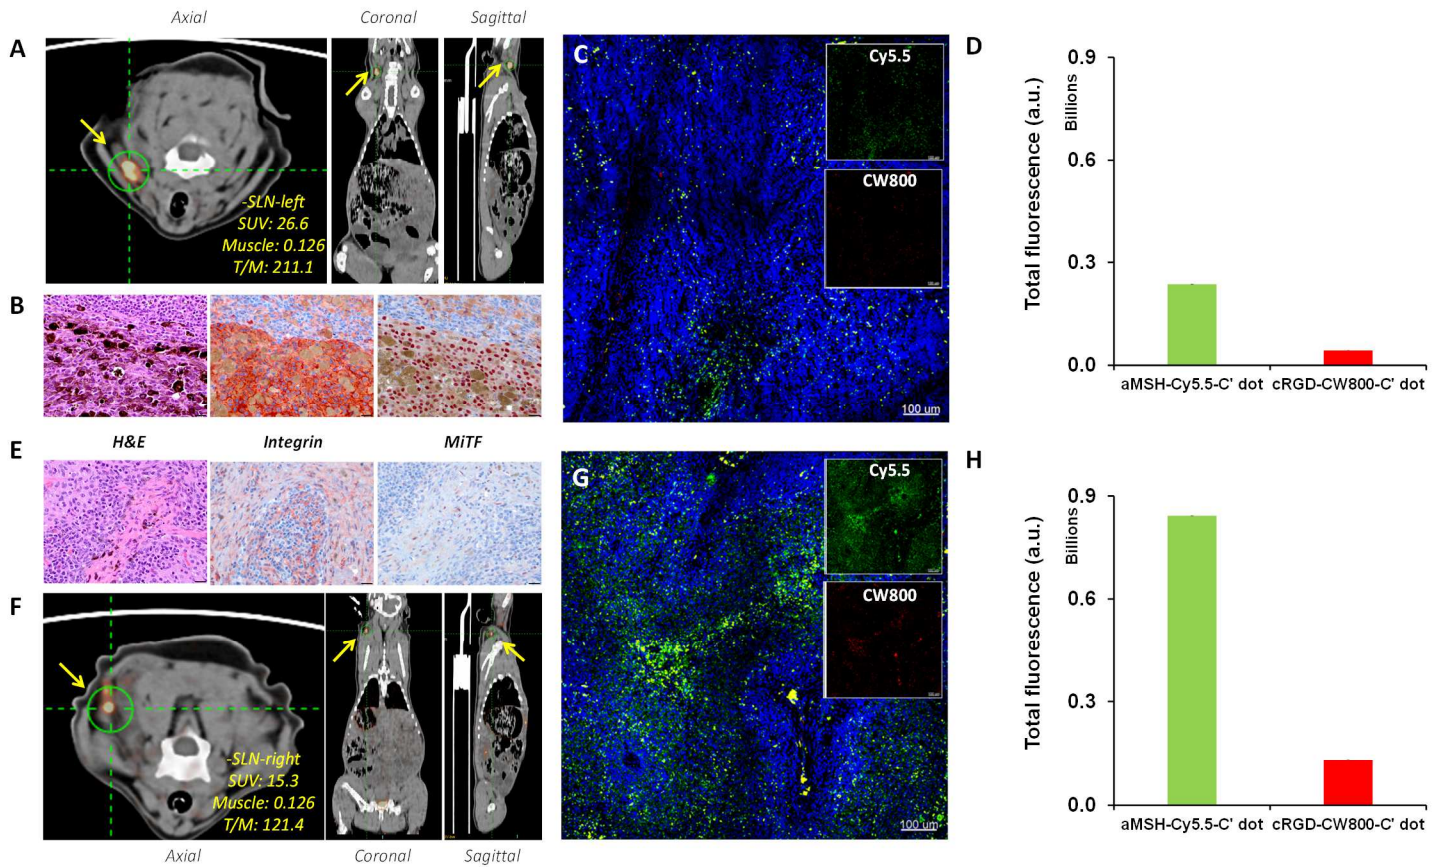

**Fig. S15. Whole-body PET/CT imaging and histological analysis of pig #6.** Preoperative whole-body PET/CT imaging of spontaneous melanoma miniswine (pig #6). (A) SLN #1, (F) SLN #2. Left: axial view. Middle: coronal view. Right: sagittal view. *Ex vivo* histological analysis of (B) SLN #1 and (E) SLN #2. Left: H&E staining. Middle: integrin staining. Right: MiTF staining. Scale bar: 20  $\mu$ m. High resolution confocal fluorescence microscopy of (C) SLN #1 and (G) SLN #2 with DAPI nuclear stain (scale bar = 100  $\mu$ m). Inset shows the corresponding Cy5.5 and CW800 channels. Quantification of Cy5.5 and CW800 signals' total fluorescence intensities of (D) SLN #1 and (H) SLN #2. (Photo Credit: Feng Chen, Brian Madajewski & S ebastien Monette, Memorial Sloan Kettering Cancer Center).



**Pig #7**

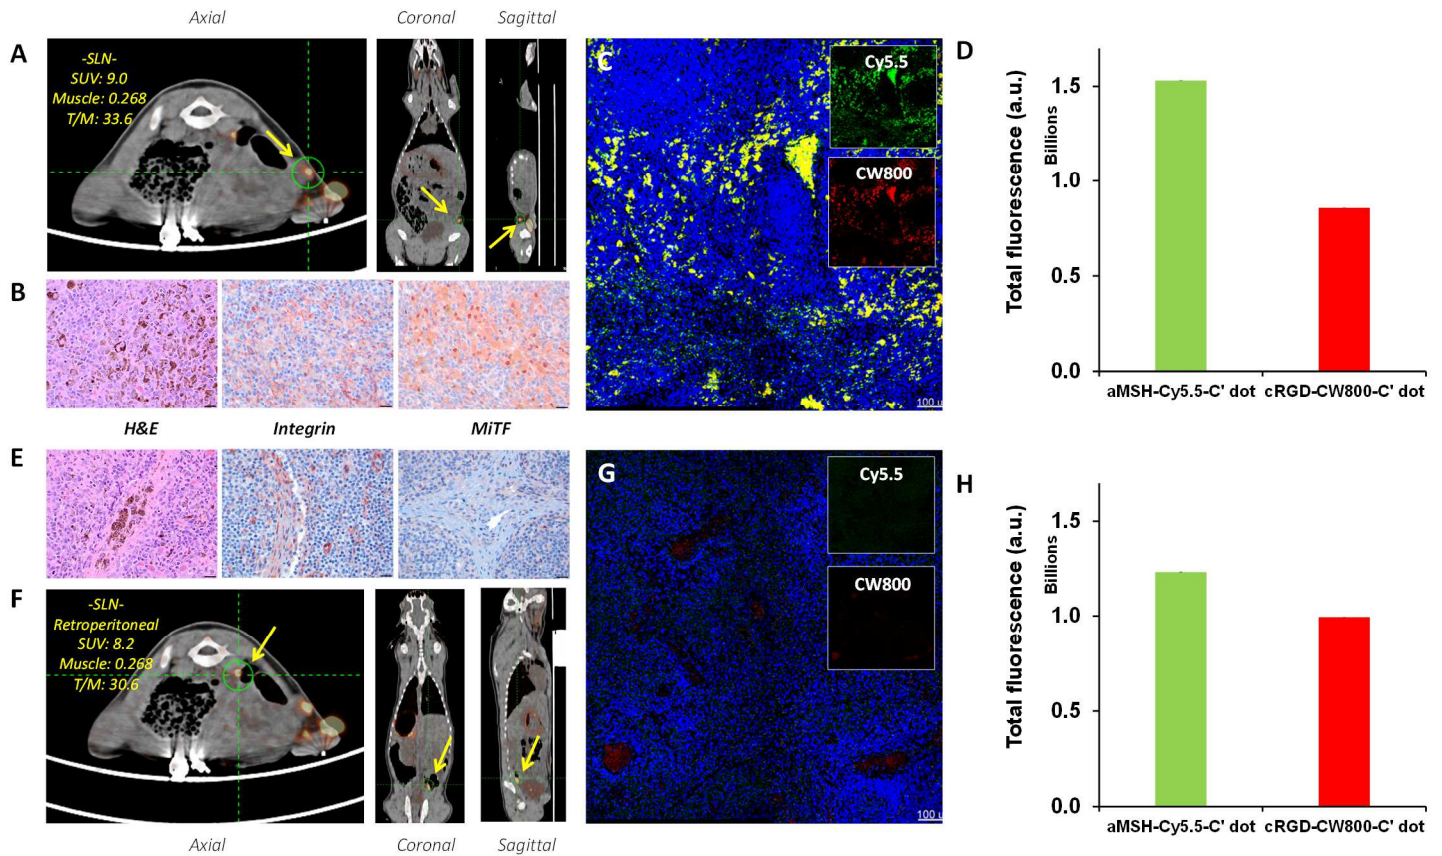

**Fig. S16. Whole-body PET/CT imaging and histological analysis of pig #7.** Preoperative whole-body PET/CT imaging of spontaneous melanoma miniswine (pig #7). (A) SLN, (F) Retroperitoneal SLN. Left: axial view. Middle: coronal view. Right: sagittal view. *Ex vivo* histological analysis of (B) SLN and (E) Retroperitoneal SLN. Left: H&E staining. Middle: integrin staining. Right: MiTF staining. Scale bar: 20  $\mu$ m. High resolution confocal fluorescence microscopy of (C) SLN and (G) Retroperitoneal SLN with DAPI nuclear stain (scale bar = 100  $\mu$ m). Inset shows the corresponding Cy5.5 and CW800 channels. Quantification of Cy5.5 and CW800 signals' total fluorescence intensities of (D) SLN and (H) Retroperitoneal SLN. (Photo Credit: Feng Chen, Brian Madajewski & Sébastien Monette, Memorial Sloan Kettering Cancer Center).

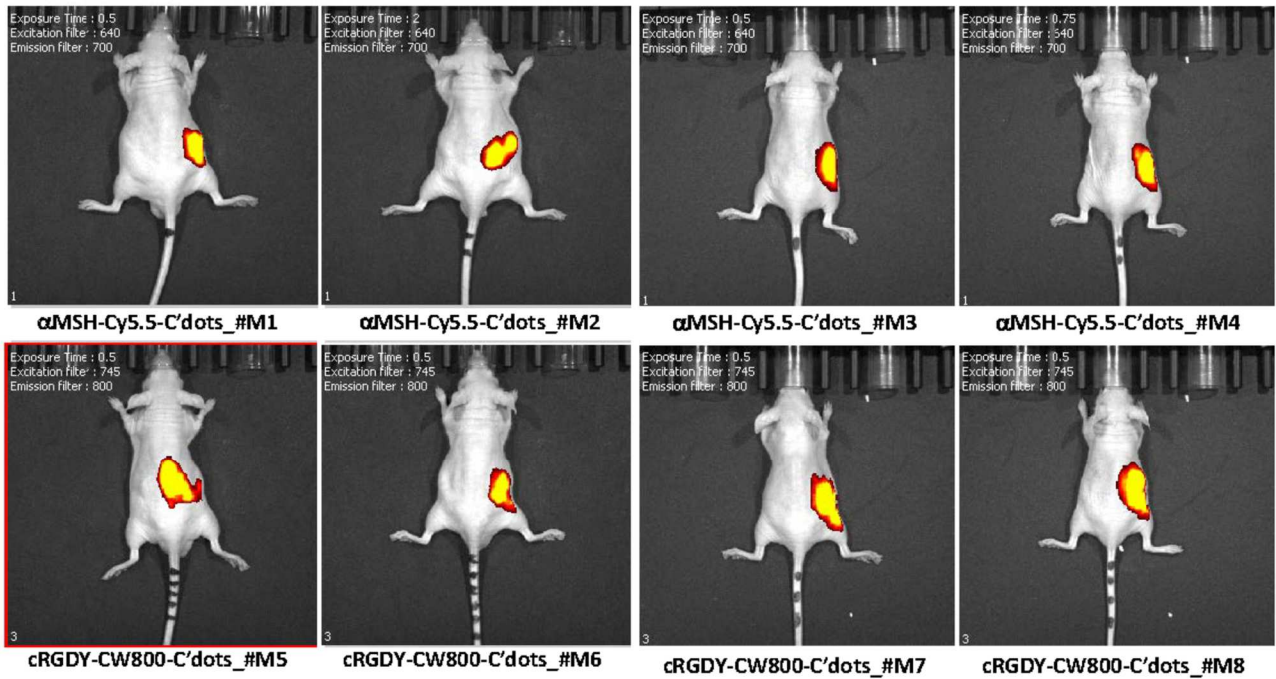

**Fig. S17. IVIS imaging to identify nanoparticles at the tumor site.** Mice in Groups 1-4 were anesthetized using isoflurane and whole-body optical fluorescence imaging was acquired to identify nanoparticle fluorescence at the tumor site (subcutaneous injection) on Study Day 1, 15 minutes post-injection. Mice were scanned using the IVIS Spectrum photon-counting device optical imaging system (Xenogen, Alameda, CA) with the blocks and filters for Cy5.5 fluorescence (Ex: 684 nm; Em: 710 nm) and CW800 fluorescence (Excitation: 778 nm, Emission: 794 nm). (Photo Credit: Elisa de Stanchina, Memorial Sloan Kettering Cancer Center).

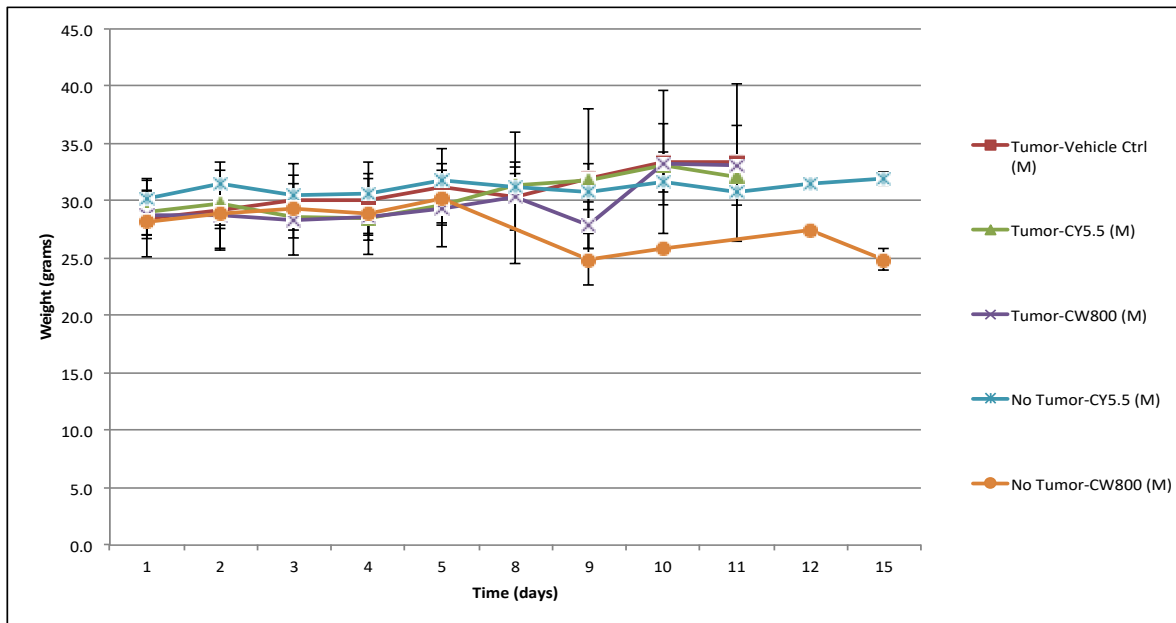

**Fig. S18. Average body weight of all male mice from the microdose toxicology study.** (Photo Credit: Elisa de Stanchina, Memorial Sloan Kettering Cancer Center).

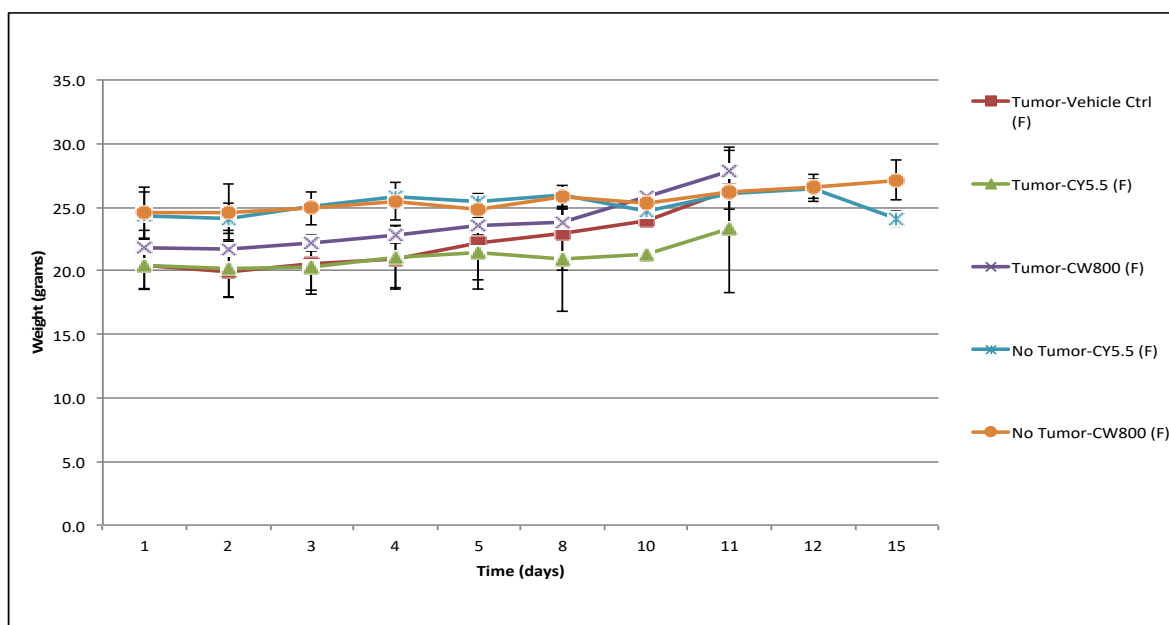

**Fig. S19. Average body weight of all female mice from the microdose toxicology study.** (Photo Credit: Elisa de Stanchina, Memorial Sloan Kettering Cancer Center).

## 2. SUPPLEMENTARY TABLES

**Table S1. Optimization of 800-nm emitted NIR fluorescent C' dots.**

|                   | Sample           | Diameter | Measured Absorbance Peak | Measured Emission Peak | # of dyes per C' dot | Relative Brightness |        |
|-------------------|------------------|----------|--------------------------|------------------------|----------------------|---------------------|--------|
|                   |                  |          |                          |                        |                      | Single dye          | C' dot |
| First NIR window  | Cy5.5 dye        | 1.4 nm   | 675 nm                   | 693 nm                 | -                    | 1 (reference)       | -      |
|                   | PEG-Cy5.5-C' dot | 6.4 nm   | 678 nm                   | 697 nm                 | 1.7                  | 1.5                 | 2.6    |
| Second NIR window | DY782 dye        | 1.9 nm   | 768 nm                   | 792 nm                 | -                    | 1 (reference)       | -      |
|                   | DY800 dye        | 2.1 nm   | 771 nm                   | 790 nm                 | -                    | 2.8                 | -      |
|                   | CW800 dye        | 1.7 nm   | 775 nm                   | 792 nm                 | -                    | 5.9                 | -      |
|                   | PEG-DY782-C' dot | 5.9 nm   | 780 nm                   | 802 nm                 | 1.7                  | 11.3                | 19.2   |
|                   | PEG-DY800-C' dot | 5.0 nm   | 791 nm                   | 806 nm                 | 2.3                  | 8.3                 | 19.1   |
|                   | PEG-CW800-C' dot | 6.2 nm   | 795 nm                   | 810 nm                 | 3.0                  | 17.1                | 51.2   |



**Table S2. In vivo signal intensity and bleed-through percentage of cocktail C' dots excited with a 700-nm laser. (800 signal/700 signal)\*100 = bleed %.**

| Cocktail C' dots concentration | Signal in 700 nm channel | Signal in 800 nm channel | Bleed percentage |
|--------------------------------|--------------------------|--------------------------|------------------|
| 15 $\mu$ M                     | 210.3 (saturated)        | 36.6                     | 17.4             |
| 1.5 $\mu$ M                    | 210.3 (saturated)        | 14.9                     | 7.1              |
| 0.15 $\mu$ M                   | 101.0                    | 1.1                      | 1.1              |

**Table S3. Summary of the injection information of all seven spontaneous melanoma miniswines. Each miniswine was injected with 19-28 MBq of <sup>124</sup>I-cRGDY-PEG-CW800-C' dots.**

| Pig #  | Injection time       | Imaging time         | Post-injection time | Weight (kg) | Total injected dose (MBq) |
|--------|----------------------|----------------------|---------------------|-------------|---------------------------|
| Pig #1 | 2014/07/09, 10:29 AM | 2014/07/09, 11:22 AM | ~ 1 h               | 3.88        | 24.4                      |
| Pig #2 | 2014/08/06, 10:38 AM | 2014/08/06, 11:41 AM | ~ 1 h               | 14.5        | 28.1                      |
| Pig #3 | 2015/04/08, 10:09 AM | 2015/04/08, 11:08 AM | ~ 1 h               | 12.5        | 23.2                      |
| Pig #4 | 2015/04/13, 09:48 AM | 2015/04/13, 10:42 AM | ~ 1 h               | 13.1        | 24.5                      |
| Pig #5 | 2015/06/23, 10:27 AM | 2015/06/23, 11:23 AM | ~ 1 h               | 16.3        | 20.5                      |
| Pig #6 | 2015/10/13, 11:20 AM | 2015/10/13, 12:20 AM | ~ 1 h               | 6.3         | 22.2                      |
| Pig #7 | 2016/02/23, 10:26 AM | 2016/02/23, 11:25 AM | ~ 1 h               | 4.68        | 19.4                      |

**Table S4. Summary of PET SUV numbers of all nodes from seven spontaneous melanoma miniswines (~0.5-mm tumor burden was highlighted in green; NA means tumor burden diameter was not available).**

| Miniswine ID | Name of the node    | SUV (Mean) | SD   | SUV (Min.) | SUV (Max.) | Muscle (Mean SUV) | Target to background ratio | SD     | Tumor burden Diameter (mm) |
|--------------|---------------------|------------|------|------------|------------|-------------------|----------------------------|--------|----------------------------|
| #1           | Right SLN           | 7.1        | 1.0  | 5.3        | 8.9        | 0.159             | 44.65                      | 6.29   | 2.50                       |
|              | Right inguinal node | 12.4       | 1.2  | 11.5       | 13.9       |                   | 77.99                      | 7.55   | 2.10                       |
| #2           | Left: SLN #1        | 229.8      | 13.5 | 207.7      | 251.4      | 0.0995            | 2309.55                    | 135.68 | 13.20                      |
|              | Right: SLN #1       | 359.4      | 30.5 | 301.6      | 410.2      |                   | 1604.46                    | 136.16 | 8.20                       |
| #3           | Pelvic node         | 86.6       | 11.7 | 73.7       | 101.2      | 0.224             | 386.61                     | 52.23  | 2.10                       |
|              | Left: SLN           | 114.5      | 14.6 | 89.4       | 142.1      |                   | 661.85                     | 84.39  | NA                         |
|              | Right: SLN          | 82.5       | 4.9  | 76.6       | 89.0       |                   | 476.88                     | 28.32  | NA                         |
| #5           | Left: SLN #1        | 73.3       | 29.2 | 66.1       | 80.4       | 0.129             | 568.22                     | 226.36 | 5.70                       |
|              | Left: SLN #2        | 26.5       | 7.2  | 22.5       | 29.8       |                   | 205.43                     | 55.81  | 0.50                       |
|              | Left: SLN #1        | 26.6       | 2.6  | 22.4       | 31.7       |                   | 211.11                     | 20.63  | 3.70                       |
| #6           | Left: SLN #2        | 15.3       | 0.7  | 14.5       | 16.2       | 0.126             | 121.43                     | 5.56   | NA                         |
|              | Right SLN           | 9.0        | 1.0  | 6.7        | 10.5       |                   | 33.58                      | 3.73   | 1.60                       |
|              | Retroperitoneal SLN | 8.2        | 1.0  | 6.2        | 9.7        |                   | 30.60                      | 3.73   | NA                         |

**Table S5. Microdose toxicology study animal group.**

| Group                                            | Mice/group | Sex | Mice ID # | Sac. day | Tumors | Necropsy            |
|--------------------------------------------------|------------|-----|-----------|----------|--------|---------------------|
| <b>Imaging samples</b>                           |            |     |           |          |        |                     |
| 1. αMSH-PEG-Cy5.5-C'dots (1.2 nmol)              | 2          | M   | 1-2       | Day 1    | No     | No                  |
| 2. αMSH-PEG-Cy5.5-C'dots (1.2 nmol)              | 2          | F   | 3-4       | Day 1    | No     | No                  |
| 3. cRGDY-PEG-CW800-C'dots (1.2 nmol)             | 2          | M   | 5-6       | Day 1    | No     | No                  |
| 4. cRGDY-PEG-CW800-C'dots (1.2 nmol)             | 2          | F   | 7-8       | Day 1    | No     | No                  |
| <b>Interim sacrifice on day 2</b>                |            |     |           |          |        |                     |
| 5. M21 Tumor- Saline Control                     | 10         | M   | 9-18      | Day 2    | Yes    | Gross and histology |
| 6. M21 Tumor- Saline Control                     | 10         | F   | 19-28     | Day 2    | Yes    | Gross and histology |
| 7. M21 Tumor- αMSH-PEG-Cy5.5-C'dots (1.2 nmol)   | 10         | M   | 29-38     | Day 2    | Yes    | Gross and histology |
| 8. M21 Tumor- αMSH-PEG-Cy5.5-C'dots (1.2 nmol)   | 10         | F   | 39-48     | Day 2    | Yes    | Gross and histology |
| 9. M21 Tumor- cRGDY-PEG-CW800-C'dots (1.2 nmol)  | 10         | M   | 49-58     | Day 2    | Yes    | Gross and histology |
| 10. M21 Tumor- cRGDY-PEG-CW800-C'dots (1.2 nmol) | 10         | F   | 59-68     | Day 2    | Yes    | Gross and histology |
| 11. No Tumor- αMSH-PEG-Cy5.5-C'dots (1.2 nmol)   | 3          | M   | 69-71     | Day 2    | No     | Gross               |
| 12. No Tumor - αMSH-PEG-Cy5.5-C'dots (1.2 nmol)  | 3          | F   | 72-74     | Day 2    | No     | Gross               |
| 13. No Tumor- cRGDY-PEG-CW800-C'dots (1.2 nmol)  | 3          | M   | 75-77     | Day 2    | No     | Gross               |
| 14. No Tumor- cRGDY-PEG-CW800-C'dots (1.2 nmol)  | 3          | F   | 78-80     | Day 2    | No     | Gross               |
| <b>Final sacrifice on day 14</b>                 |            |     |           |          |        |                     |
| 15. M21 Tumor- Saline Control                    | 5          | M   | 81-85     | Day 14   | Yes    | Gross and histology |
| 16. M21 Tumor- Saline Control                    | 5          | F   | 86-90     | Day 14   | Yes    | Gross and histology |
| 17. M21 Tumor- αMSH-PEG-Cy5.5-C'dots (1.2 nmol)  | 5          | M   | 91-95     | Day 14   | Yes    | Gross and histology |
| 18. M21 Tumor- αMSH-PEG-Cy5.5-C'dots (1.2 nmol)  | 5          | F   | 96-100    | Day 14   | Yes    | Gross and histology |
| 19. M21 Tumor- cRGDY-PEG-CW800-C'dots (1.2 nmol) | 5          | M   | 111-105   | Day 14   | Yes    | Gross and histology |
| 20. M21 Tumor- cRGDY-PEG-CW800-C'dots (1.2 nmol) | 5          | F   | 106-110   | Day 14   | Yes    | Gross and histology |
| 21. No Tumor- αMSH-PEG-Cy5.5-C'dots (1.2 nmol)   | 3          | M   | 111-113   | Day 14   | No     | Gross               |
| 22. No Tumor - αMSH-PEG-Cy5.5-C'dots (1.2 nmol)  | 3          | F   | 114-116   | Day 14   | No     | Gross               |
| 23. No Tumor- cRGDY-PEG-CW800-C'dots (1.2 nmol)  | 3          | M   | 117-119   | Day 14   | No     | Gross               |
| 24. No Tumor- cRGDY-PEG-CW800-C'dots (1.2 nmol)  | 3          | F   | 120-122   | Day 14   | No     | Gross               |

**Table S6. Mortality and morbidity summary table of the microdose toxicology study.**

| Group #                                                      | Sex | Animal ID# | Study day Found dead | Possible cause of death | Test article related |
|--------------------------------------------------------------|-----|------------|----------------------|-------------------------|----------------------|
| 18. Tumor Test Article αMSH-PEG-Cy5.5-C'dots at 1.2 nmol     | F   | 99, 100    | 11                   | Large Tumor burden      | Unlikely             |
| 19. Tumor Test Article cRGDY-PEG-CW800-C'dots at 1.2 nmol    | M   | 103        | 9                    | Large Tumor burden      | Unlikely             |
| 20. Tumor Test Article cRGDY-PEG-CW800-C'dots at 1.2 nmol    | F   | 108        | 11                   | Large Tumor burden      | Unlikely             |
| 23. No Tumor Test Article cRGDY-PEG-CW800-C'dots at 1.2 nmol | M   | 118        | 8                    | Skin infection          | No                   |

**Table S7. Hematology parameters in the microdose toxicology study.**

| Hematology Parameter                             |
|--------------------------------------------------|
| Total Leukocyte count (WBC)                      |
| % Neutrophils                                    |
| % Lymphocyte                                     |
| % Monocytes                                      |
| % Basophils                                      |
| % Eosinophils                                    |
| Erythrocyte count (RBC)                          |
| Hemoglobin (HB)                                  |
| Hematocrit (HCT)                                 |
| Mean Corpuscular Volume (MCV)                    |
| Mean Corpuscular Hemoglobin (MCH)                |
| Mean Corpuscular Hemoglobin Concentration (MCHC) |
| Platelet count                                   |
| Mean Platelet Volume (MPV)                       |
| Red Blood Cell Distribution Width (RDW)          |

**Table S8. Clinical chemistry parameters in the microdose toxicology study.**

| <b>Clinical Chemistry Parameter</b>    |
|----------------------------------------|
| Alkaline Phosphatase (ALP)             |
| Alanine Aminotransferase (ALT)         |
| Serum Aspartate Aminotransferase (AST) |
| Albumin                                |
| Total Protein                          |
| Globulin                               |
| Total Bilirubin                        |
| Blood Urea Nitrogen (BUN)              |
| Creatinine                             |
| Cholesterol                            |
| Glucose                                |
| Calcium                                |
| Phosphorus                             |
| Chloride                               |
| Potassium                              |
| Sodium                                 |
| Sodium/Potassium ratio (Na/K ratio)    |
| Albumin/Globulin ratio (A/G ratio)     |

**Table S9. Tissues examined microscopically in the microdose toxicology study.**

| <b>Tissues</b>         |                  |
|------------------------|------------------|
| Adrenals               | Ovaries          |
| Bone marrow            | Oviducts         |
| Bones/joints           | Pancreas         |
| Brain                  | Pituitary gland  |
| Cecum                  | Prostate         |
| Cervix                 | Salivary glands  |
| Colon                  | Skeletal muscle  |
| Epididymis             | Seminal Vesicles |
| Esophagus              | Small intestine  |
| Eyes                   | Spinal cord      |
| Gall bladder           | Spleen           |
| Haired skin            | Stomach          |
| Heart                  | Testes           |
| Kidneys                | Thyroids         |
| Liver                  | Trachea          |
| Lungs                  | Tongue           |
| Mandibular lymph nodes | Urinary Bladder  |
| Mesenteric lymph nodes | Uterus           |
| Nasal cavity           | Vagina           |
| Oral cavity            |                  |



**Table S13. Hematology parameters, group 8, female, tumor, test article αMSH-PEG-Cy5.5-C' dots at 1.2 nmol, day 2.**

| Animal No | WBC       | NEU       | LYM       | MONO   | EOS    | BAS    | NEU %     | LYM %     | MONO % | EOS %  | BAS % | RBC     | HGB       | HCT       | MCV       | MCH       | MCHC      | RDW%      | PLT     | MPV      |    |
|-----------|-----------|-----------|-----------|--------|--------|--------|-----------|-----------|--------|--------|-------|---------|-----------|-----------|-----------|-----------|-----------|-----------|---------|----------|----|
|           | K/ul      | K/ul      | K/ul      | K/ul   | K/ul   | K/ul   | %         | %         | %      | %      | %     | M/ul    | g/dL      | %         | fL        | Pg        | g/dL      | %         | K/ul    | fL       |    |
|           | 6.95-9.95 | 3.58-5.48 | 1.75-3.03 | 0-3.24 | 0-1.86 | 0-0.20 | 53.7-77.7 | 11.8-25.8 | 0-18.4 | 0-10.6 | 0-2.0 | 4.8-5.4 | 15.6-17.2 | 43.5-51.5 | 87.1-99.1 | 29.7-34.7 | 31.5-37.5 | 13.9-19.9 | 443-563 | 6.7-12.7 |    |
| 39        | 8.3       | 1.6       | 6.3       | 0.3    | 0.2    | 0      | 18.7      | 75.7      | 3.6    | 2      | 0     | 7       | 14.2      | 38.2      | 54.3      | 20.2      | 37.1      | 10.8      | 1056    | 5.1      |    |
| 40        | 9.3       | 1.8       | 7         | 0.2    | 0.3    | 0      | 19.6      | 74.8      | 2.4    | 3      | 0.2   | 7.4     | 13.9      | 38.6      | 52.6      | 19        | 36.1      | 10.9      | 1124    | 4.7      |    |
| 41        | 11        | 3.4       | 6.8       | 0.4    | 0.4    | 0      | 30.8      | 62        | 3.3    | 3.8    | 0.1   | 7.3     | 13.9      | 38        | 52.3      | 19.1      | 36.6      | 11.2      | 1263    | 4.5      |    |
| 42        | 7.4       | 1.4       | 5.5       | 0.3    | 0.2    | 0      | 18.8      | 75.1      | 3.6    | 2.5    | 0     | 7.1     | 13.7      | 37.3      | 52.3      | 19.2      | 36.7      | 11        | 1308    | 4.4      |    |
| 43        | 7.8       | 1.4       | 6.1       | 0.2    | 0.2    | 0      | 18        | 77.5      | 2      | 2.2    | 0.3   | 7.8     | 14.6      | 41.6      | 53.3      | 18.8      | 35.2      | 12.1      | 1106    | 4.4      |    |
| 44        | 14.8      | 3.4       | 10.4      | 0.4    | 0.7    | 0      | 22.9      | 70.3      | 2.5    | 4.5    | 0.1   | 7.9     | 15        | 41.2      | 52.6      | 19.2      | 36.5      | 11.5      | 1212    | 4.4      |    |
| 45        | 6.5       | 2         | 4.2       | 0.2    | 0.2    | 0      | 30.6      | 63.8      | 3.1    | 2.3    | 0.2   | 7.8     | 15.1      | 41.3      | 52.7      | 19.2      | 36.5      | 11.5      | 211     | 5.8      |    |
| 46        | 5.3       | 1.5       | 3.3       | 0.2    | 0.2    | 0      | 28.3      | 63.4      | 4.3    | 3.7    | 0.3   | 7.9     | 14.8      | 41.4      | 52.9      | 18.8      | 35.7      | 10.9      | 951     | 4.6      |    |
| 47        | 6.6       | 1.6       | 4.7       | 0.2    | 0.2    | 0      | 24.5      | 70.3      | 2.4    | 2.7    | 0.1   | 7.2     | 14        | 39        | 54        | 19.4      | 36        | 11.2      | 709     | 5.2      |    |
| 48        | 5.6       | 1.6       | 3.7       | 0.2    | 0.2    | 0      | 28.4      | 64.6      | 3      | 3.8    | 0.2   | 7.1     | 13        | 36.7      | 51.6      | 18.3      | 35.5      | 11.7      | 1062    | 4.7      |    |
| Mean      | 8.3       | 2         | 5.8       | 0.2    | 0.3    | 0      | 24        | 69.8      | 3      | 3.1    | 0.2   | 7.4     | 14.2      | 38.3      | 52.8      | 19.1      | 36.2      | 11.3      | 1000.2  | 4.8      |    |
| SD        | 2.9       | 0.8       | 2.1       | 0.1    | 0.2    | 0      | 6.2       | 5.9       | 0.7    | 0.8    | 0.1   | 0.3     | 0.7       | 1.9       | 0.8       | 0.5       | 0.6       | 0.4       | 325.3   | 0.5      |    |
| SEM       | 0.9       | 0.2       | 0.7       | 0      | 0.1    | 0      | 1.6       | 1.9       | 0.2    | 0.3    | 0     | 0.1     | 0.2       | 0.6       | 0.3       | 0.2       | 0.2       | 0.1       | 102.9   | 0.1      |    |
| N         | 10        | 10        | 10        | 10     | 10     | 10     | 10        | 10        | 10     | 10     | 10    | 10      | 10        | 10        | 10        | 10        | 10        | 10        | 10      | 10       | 10 |

**Table S14. Hematology parameters, group 9, male, tumor, test article cRGDY-PEG-cw800-C' dots at 1.2 nmol, day 2.**

| Animal No | WBC       | NEU       | LYM       | MONO   | EOS    | BAS    | NEU %     | LYM %     | MONO % | EOS %  | BAS % | RBC     | HGB       | HCT       | MCV       | MCH       | MCHC      | RDW%      | PLT     | MPV      |    |
|-----------|-----------|-----------|-----------|--------|--------|--------|-----------|-----------|--------|--------|-------|---------|-----------|-----------|-----------|-----------|-----------|-----------|---------|----------|----|
|           | K/ul      | K/ul      | K/ul      | K/ul   | K/ul   | K/ul   | %         | %         | %      | %      | %     | M/ul    | g/dL      | %         | fL        | Pg        | g/dL      | %         | K/ul    | fL       |    |
|           | 6.95-9.95 | 3.58-5.48 | 1.75-3.03 | 0-3.24 | 0-1.86 | 0-0.20 | 53.7-77.7 | 11.8-25.8 | 0-18.4 | 0-10.6 | 0-2.0 | 4.8-5.4 | 15.6-17.2 | 43.5-51.5 | 87.1-99.1 | 29.7-34.7 | 31.5-37.5 | 13.9-19.9 | 443-563 | 6.7-12.7 |    |
| 49        | 7.7       | 4.2       | 3         | 0.3    | 0.2    | 0      | 54.4      | 39.3      | 3.6    | 2.3    | 0.4   | 7.3     | 14.6      | 39.5      | 54.1      | 20        | 36.9      | 11.1      | 1023    | 4.6      |    |
| 50        | 7.9       | 3.6       | 4         | 0.2    | 0.2    | 0      | 45.1      | 50.3      | 2.3    | 2      | 0.3   | 8.6     | 16.2      | 44.5      | 51.9      | 18.9      | 36.4      | 11.5      | 1129    | 4.9      |    |
| 51        | 6.6       | 3.5       | 2.7       | 0.2    | 0.2    | 0      | 53.1      | 41.2      | 2.7    | 2.9    | 0.1   | 7.8     | 14.8      | 40.5      | 51.9      | 19        | 36.6      | 10.7      | 1209    | 4.9      |    |
| 52        | 5.4       | 2.6       | 2.5       | 0.1    | 0.1    | 0      | 48.3      | 46.9      | 2.5    | 1.9    | 0.4   | 8       | 15.8      | 43.6      | 54.4      | 19.7      | 36.3      | 11.3      | 954     | 4.8      |    |
| 53        | 8         | 1.3       | 6.3       | 0.3    | 0.2    | 0      | 16.9      | 78.9      | 3.5    | 1.9    | 0.2   | 8.1     | 15.2      | 42.4      | 52.9      | 18.9      | 36.9      | 11.5      | 1394    | 4.3      |    |
| 54        | 11.6      | 1.7       | 9.5       | 0.2    | 0.2    | 0      | 15        | 81.5      | 1.9    | 1.5    | 0.1   | 7.7     | 14.3      | 40.5      | 52.7      | 18.7      | 35.4      | 11.4      | 1427    | 4.6      |    |
| 55        | 11.1      | 2.2       | 8.2       | 0.4    | 0.2    | 0      | 20        | 74.2      | 3.9    | 1.8    | 0.1   | 8.1     | 15        | 40.6      | 50.4      | 18.6      | 36.9      | 11.2      | 1164    | 4.7      |    |
| 56        | 7.2       | 1.5       | 5.5       | 0.1    | 0.1    | 0      | 20.4      | 76        | 1.8    | 1.7    | 0.1   | 7.7     | 14.1      | 40.7      | 53.1      | 18.4      | 34.7      | 11.7      | 656     | 5.3      |    |
| 57        | 6.7       | 2.5       | 3.7       | 0.3    | 0.2    | 0      | 37.6      | 56        | 3.8    | 2.6    | 0     | 7.8     | 15.1      | 41.6      | 53.3      | 19.3      | 36.2      | 12.3      | 1032    | 4.5      |    |
| 58        | 8.6       | 4         | 3.7       | 0.6    | 0.3    | 0      | 46.5      | 42.4      | 7.1    | 3.6    | 0.4   | 8.1     | 16        | 43.3      | 53.5      | 19.7      | 36.9      | 10.9      | 907     | 4.9      |    |
| Mean      | 8.1       | 2.7       | 4.9       | 0.3    | 0.2    | 0      | 35.6      | 58.6      | 3.3    | 2.2    | 0.2   | 7.9     | 15.1      | 41.7      | 52.8      | 19.1      | 36.2      | 11.4      | 1087.5  | 4.8      |    |
| SD        | 2         | 1.1       | 2.4       | 0.1    | 0.1    | 0      | 16.1      | 17.1      | 1.5    | 0.6    | 0.2   | 0.3     | 0.7       | 1.6       | 1.2       | 0.5       | 0.7       | 0.4       | 234.9   | 0.3      |    |
| SEM       | 0.6       | 0.3       | 0.8       | 0      | 0      | 0      | 5.1       | 5.4       | 0.5    | 0.2    | 0     | 0.1     | 0.2       | 0.5       | 0.4       | 0.2       | 0.2       | 0.1       | 71.1    | 0.1      |    |
| N         | 10        | 10        | 10        | 10     | 10     | 10     | 10        | 10        | 10     | 10     | 10    | 10      | 10        | 10        | 10        | 10        | 10        | 10        | 10      | 10       | 10 |

**Table S15. Hematology parameters, group 10, female, tumor, test article cRGDY-PEG-cw800-C' dots at 1.2 nmol, day 2.**

| Animal No | WBC       | NEU       | LYM       | MONO   | EOS    | BAS    | NEU %     | LYM %     | MONO % | EOS %  | BAS % | RBC     | HGB       | HCT       | MCV       | MCH       | MCHC      | RDW%      | PLT     | MPV      |    |
|-----------|-----------|-----------|-----------|--------|--------|--------|-----------|-----------|--------|--------|-------|---------|-----------|-----------|-----------|-----------|-----------|-----------|---------|----------|----|
|           | K/ul      | K/ul      | K/ul      | K/ul   | K/ul   | K/ul   | %         | %         | %      | %      | %     | M/ul    | g/dL      | %         | fL        | Pg        | g/dL      | %         | K/ul    | fL       |    |
|           | 6.95-9.95 | 3.58-5.48 | 1.75-3.03 | 0-3.24 | 0-1.86 | 0-0.20 | 53.7-77.7 | 11.8-25.8 | 0-18.4 | 0-10.6 | 0-2.0 | 4.8-5.4 | 15.6-17.2 | 43.5-51.5 | 87.1-99.1 | 29.7-34.7 | 31.5-37.5 | 13.9-19.9 | 443-563 | 6.7-12.7 |    |
| 59        | 8         | 1.6       | 4         | 0.2    | 0.2    | 0      | 26.9      | 65.9      | 3.8    | 3.3    | 0.1   | 7.4     | 13.4      | 37.6      | 50.7      | 18.1      | 35.6      | 11.6      | 1056    | 4.3      |    |
| 60        | 8.9       | 1.9       | 6.5       | 0.3    | 0.2    | 0      | 21.3      | 73.4      | 3.2    | 1.9    | 0.2   | 9       | 16.3      | 45.1      | 50.2      | 19.2      | 36.2      | 11        | 1040    | 5        |    |
| 61        | 12.4      | 2.8       | 9         | 0.5    | 0.2    | 0      | 22.1      | 72.2      | 4      | 1.6    | 0.1   | 8.1     | 15.4      | 42.4      | 52.2      | 18.9      | 36.3      | 11.6      | 974     | 4.9      |    |
| 62        | 4.2       | 1.2       | 2.7       | 0.2    | 0.1    | 0      | 28.4      | 64.6      | 4.3    | 2.6    | 0.1   | 8.3     | 15.1      | 41.6      | 50        | 18.2      | 36.3      | 11.8      | 623     | 4.6      |    |
| 63        | 3.2       | 0.9       | 2.2       | 0.1    | 0.1    | 0      | 26.6      | 67.4      | 1.8    | 4      | 0.2   | 7.5     | 14.3      | 39.9      | 53.1      | 19.1      | 35.9      | 12        | 1022    | 4.6      |    |
| 64        | 7.4       | 2.9       | 4.1       | 0.3    | 0.1    | 0      | 38.7      | 55        | 4.4    | 1.8    | 0.1   | 7.8     | 14.9      | 38.8      | 50.9      | 19        | 37.3      | 11.7      | 1027    | 4.9      |    |
| 65        | 5.3       | 1.8       | 3.3       | 0.2    | 0.1    | 0      | 33.2      | 62        | 3.4    | 1.4    | 0     | 7.6     | 14        | 38.5      | 50.5      | 18.4      | 36.4      | 11.5      | 969     | 4.7      |    |
| 66        | 8.3       | 1.6       | 6.4       | 0.2    | 0.2    | 0      | 18.9      | 76.7      | 2.2    | 2      | 0.2   | 8       | 14.9      | 40.9      | 51.2      | 18.7      | 36.4      | 11.3      | 994     | 4.7      |    |
| 67        | 5.9       | 1.7       | 4         | 0.1    | 0.1    | 0      | 29.3      | 66.9      | 2.4    | 1.4    | 0     | 8.4     | 15.4      | 42.6      | 50.4      | 19.2      | 36.1      | 11.2      | 1281    | 4.5      |    |
| 68        | 7.3       | 2.6       | 4.2       | 0.4    | 0.1    | 0      | 35.3      | 58.1      | 5.2    | 1.3    | 0.1   | 8       | 15        | 41.9      | 52.1      | 18.7      | 35.8      | 11.9      | 999     | 4.7      |    |
| Mean      | 6.9       | 1.9       | 4.6       | 0.2    | 0.1    | 0      | 28.1      | 66.2      | 3.5    | 2.1    | 0.1   | 8       | 14.9      | 41        | 51.1      | 18.6      | 36.2      | 11.6      | 986.4   | 4.7      |    |
| SD        | 2.6       | 0.7       | 2.1       | 0.1    | 0      | 0      | 6.3       | 6.8       | 1.1    | 0.9    | 0.1   | 0.5     | 0.8       | 2.2       | 1         | 0.4       | 0.5       | 0.3       | 155.4   | 0.2      |    |
| SEM       | 0.8       | 0.2       | 0.7       | 0      | 0      | 0      | 2         | 2.1       | 0.3    | 0.3    | 0     | 0.2     | 0.3       | 0.7       | 0.3       | 0.1       | 0.1       | 0.1       | 50.4    | 0.1      |    |
| N         | 10        | 10        | 10        | 10     | 10     | 10     | 10        | 10        | 10     | 10     | 10    | 10      | 10        | 10        | 10        | 10        | 10        | 10        | 10      | 10       | 10 |

**Table S16. Hematology parameters, group 11, male, no tumor, test article αMSH-PEG-Cy5.5-C' dots at 1.2 nmol, day 2.**

| Animal No | WBC       | NEU       | LYM       | MONO   | EOS    | BAS    | NEU %     | LYM %     | MONO % | EOS %  | BAS % | RBC     | HGB       | HCT       | MCV       | MCH       | MCHC      | RDW%      | PLT     | MPV      |
|-----------|-----------|-----------|-----------|--------|--------|--------|-----------|-----------|--------|--------|-------|---------|-----------|-----------|-----------|-----------|-----------|-----------|---------|----------|
|           | K/ul      | K/ul      | K/ul      | K/ul   | K/ul   | K/ul   | %         | %         | %      | %      | %     | M/ul    | g/dL      | %         | fL        | Pg        | g/dL      | %         | K/ul    | fL       |
|           | 6.95-9.95 | 3.58-5.48 | 1.75-3.03 | 0-3.24 | 0-1.86 | 0-0.20 | 53.7-77.7 | 11.8-25.8 | 0-18.4 | 0-10.6 | 0-2.0 | 4.8-5.4 | 15.6-17.2 | 43.5-51.5 | 87.1-99.1 | 29.7-34.7 | 31.5-37.5 | 13.9-19.9 | 443-563 | 6.7-12.7 |
| 69        | 12.5      | 2.2       | 9.6       | 0.5    | 0.2    | 0      | 17.3      | 76.9      | 4.1    | 1.8    | 0     | 8.1     | 14.9      | 41.7      | 51.7      | 18.5      | 35.8      | 11.7      | 1386    | 4.4      |
| 70        | 7         | 1.3       | 5.3       | 0.3    | 0.1    | 0      | 19.2      | 75.9      | 3.6    | 1.3    | 0     | 7.4     | 13.7      | 37.3      | 50.8      | 18.7      | 36.8      | 11.5      | 1142    | 4.8      |
| 71        | 8         | 1.9       | 5.6       | 0.3    | 0.2    | 0      | 23.3      | 70.5      | 3.8    | 2.4    | 0     | 7       | 13.4      | 37        | 53.1      | 19.2      | 36.2      | 11.3      | 1123    | 5        |
| Mean      | 9.1       | 1.8       | 6.8       | 0.4    | 0.2    | 0      | 19.9      | 74.4      | 3.8    | 1.8    | 0     | 7.5     | 14        | 38.7      | 51.9      | 18.8      | 36.3      | 11.5      | 1210.3  | 4.7      |
| SD        | 2.9       | 0.4       | 2.4       | 0.1    | 0.1    | 0      | 3.1       | 3.4       | 0.3    | 0.6    | 0     | 0.6     | 0.8       | 2.6       | 1.2       | 0.4       | 0.5       | 0.2       | 135.1   | 0.3      |
| SEM       | 1.7       | 0.2       | 1.4       | 0.1    | 0      | 0      | 1.8       | 2         | 0.1    | 0.3    | 0     | 0.3     | 0.5       | 1.5       | 0.7       | 0.2       | 0.3       | 0.1       | 78      | 0.2      |
|           |           |           |           |        |        |        |           |           |        |        |       |         |           |           |           |           |           |           |         |          |















**Table S42. Hematology parameters, group 17, male, tumor, test article  $\alpha$ MSH-PEG-Cy5.5-C' dots at 1.2 nmol, day 14.**

| Animal No | BUN     | Creatinine | Phosphorus | Calcium | Total Protein | Albumin | Globulin | Alb/Glob Ratio | Glucose | Cholesterol | ALT (GPT) | AST (GOT) | ALP     | Total Bilirubin | Sodium | Potassium | Chloride | Na/K Ratio |
|-----------|---------|------------|------------|---------|---------------|---------|----------|----------------|---------|-------------|-----------|-----------|---------|-----------------|--------|-----------|----------|------------|
|           | mg/dl   | mg/dl      | mg/dl      | mg/dl   | g/dl          | g/dl    | g/dl     | --             | mg/dl   | mg/dl       | U/L       | U/L       | U/L     | mg/dl           | mEq/L  | mEq/L     | mEq/L    | --         |
| 41.3-53.3 | 3.9-5.5 | 6.2-8.2    | 10.9-13.9  | 2.9-4.1 | 3.3-4.5       | 223-279 | 87-121   | 66-96          | 157-207 | 228-334     | 2.8-4.4   | 114-140   | 5.1-6.5 | 75-95           |        |           |          |            |
| 91        | 21.6    | 0.4        | 6.4        | 8.6     | 4.7           | 2       | 2.7      | 0.7            | 97      | 86          | 39        | >1000     | 44      | 0.1             | 155    | 4         | 119      | 39         |
| 92        | 24.2    | 0.3        | 6.3        | 7.6     | 4.6           | 2       | 2.6      | 0.8            | 131     | 100         | 40        | 982       | 45      | 0.1             | 153    | 3.3       | 117      | 46         |
| 93        | 20.2    | 0.2        | 6.8        | 8.4     | 4.5           | 2       | 2.5      | 0.8            | 151     | 100         | 48        | 945       | 52      | 0.1             | 153    | 4.3       | 117      | 36         |
| 94        | 21.1    | 0.3        | 5          | 8.7     | 4.5           | 2       | 2.5      | 0.8            | 149     | 88          | 39        | >1000     | 37      | 0.1             | 154    | 4         | 118      | 39         |
| 95        | 26.7    | 0.4        | 8          | 8.8     | 4.6           | 2.1     | 2.5      | 0.8            | 167     | 98          | 43        | 574       | 61      | 0.1             | 155    | 3.3       | 120      | 47         |
| Mean      | 22.9    | 0.3        | 6.5        | 8.4     | 4.6           | 2       | 2.6      | 0.8            | 139     | 94.4        | 41.8      | 833.7     | 47.8    | 0.1             | 154    | 3.8       | 118.2    | 41.4       |
| SD        | 2.7     | 0.1        | 1.1        | 0.5     | 0.1           | 0       | 0.1      | 0              | 26.7    | 6.8         | 3.8       | 225.6     | 9.1     | 0               | 1      | 0.5       | 1.3      | 4.8        |
| SEM       | 1.2     | 0          | 0.5        | 0.2     | 0             | 0       | 0        | 0              | 11.9    | 3.1         | 1.7       | 130.3     | 4.1     | 0               | 0.4    | 0.2       | 0.6      | 2.2        |
| N         | 5       | 5          | 5          | 5       | 5             | 5       | 5        | 5              | 5       | 5           | 5         | 3         | 5       | 5               | 5      | 5         | 5        | 5          |

**Table S43. Hematology parameters, group 18, female, tumor, test article  $\alpha$ MSH-PEG-Cy5.5-C' dots at 1.2 nmol, day 14.**

| Animal No | BUN     | Creatinine | Phosphorus | Calcium | Total Protein | Albumin | Globulin | Alb/Glob Ratio | Glucose | Cholesterol | ALT (GPT) | AST (GOT)      | ALP     | Total Bilirubin | Sodium | Potassium | Chloride | Na/K Ratio |
|-----------|---------|------------|------------|---------|---------------|---------|----------|----------------|---------|-------------|-----------|----------------|---------|-----------------|--------|-----------|----------|------------|
|           | mg/dl   | mg/dl      | mg/dl      | mg/dl   | g/dl          | g/dl    | g/dl     | --             | mg/dl   | mg/dl       | U/L       | U/L            | U/L     | mg/dl           | mEq/L  | mEq/L     | mEq/L    | --         |
| 41.3-53.3 | 3.9-5.5 | 6.2-8.2    | 10.9-13.9  | 2.9-4.1 | 3.3-4.5       | 223-279 | 87-121   | 66-96          | 157-207 | 228-334     | 2.8-4.4   | 114-140        | 5.1-6.5 | 75-95           |        |           |          |            |
| 96        | 27.3    | 0.2        | 10.9       | 9.2     | 4.7           | 2.1     | 2.6      | 0.8            | 95      | 95          | 43        | 100            | 49      | 0.2             | 155    | 4.5       | 122      | 34         |
| 97        | 35.5    | 0.2        | 8.5        | 9.1     | 4.4           | 1.9     | 2.5      | 0.8            | 213     | 98          | 45        | >1000          | 41      | 0.1             | 154    | 4         | 120      | 39         |
| 98        | 26.6    | <0.2       | 8.3        | 9.2     | 4.3           | 1.9     | 2.4      | 0.8            | 182     | 117         | 57        | >1000          | 41      | 0.1             | 152    | 3.7       | 115      | 41         |
| 99        | DEAD    | DEAD       | DEAD       | DEAD    | DEAD          | DEAD    | DEAD     | DEAD           | DEAD    | DEAD        | DEAD      | DEAD           | DEAD    | DEAD            | DEAD   | DEAD      | DEAD     | DEAD       |
| 100       | DEAD    | DEAD       | DEAD       | DEAD    | DEAD          | DEAD    | DEAD     | DEAD           | DEAD    | DEAD        | DEAD      | DEAD           | DEAD    | DEAD            | DEAD   | DEAD      | DEAD     | DEAD       |
| Mean      | 29.8    | 0.2        | 9.2        | 9.2     | 4.5           | 2       | 2.5      | 0.8            | 163.3   | 103.3       | 48.3      | Not calculated | 42.7    | 0.1             | 153.7  | 4.1       | 119      | 38         |
| SD        | 4.9     | 0          | 1.4        | 0.1     | 0.2           | 0.1     | 0.1      | 0              | 61.2    | 11.9        | 7.6       | Not calculated | 4.6     | 0.1             | 1.5    | 0.4       | 3.6      | 3.6        |
| SEM       | 2.9     | 0          | 0.8        | 0       | 0.1           | 0.1     | 0.1      | 0              | 35.3    | 6.9         | 4.4       | Not calculated | 2.7     | 0               | 0.9    | 0.2       | 2.1      | 2.1        |
| N         | 3       | 2          | 3          | 3       | 3             | 3       | 3        | 3              | 3       | 3           | 3         | 3.0            | 3       | 3               | 3      | 3         | 3        | 3          |

**Table S44. Hematology parameters, group 19, male, tumor, test article cRGDY-PEG-cw800-C' dots at 1.2 nmol, day 14.**

| Animal No | BUN     | Creatinine | Phosphorus | Calcium | Total Protein | Albumin | Globulin | Alb/Glob Ratio | Glucose | Cholesterol | ALT (GPT) | AST (GOT)      | ALP     | Total Bilirubin | Sodium | Potassium | Chloride | Na/K Ratio |
|-----------|---------|------------|------------|---------|---------------|---------|----------|----------------|---------|-------------|-----------|----------------|---------|-----------------|--------|-----------|----------|------------|
|           | mg/dl   | mg/dl      | mg/dl      | mg/dl   | g/dl          | g/dl    | g/dl     | --             | mg/dl   | mg/dl       | U/L       | U/L            | U/L     | mg/dl           | mEq/L  | mEq/L     | mEq/L    | --         |
| 41.3-53.3 | 3.9-5.5 | 6.2-8.2    | 10.9-13.9  | 2.9-4.1 | 3.3-4.5       | 223-279 | 87-121   | 66-96          | 157-207 | 228-334     | 2.8-4.4   | 114-140        | 5.1-6.5 | 75-95           |        |           |          |            |
| 101       | 23.1    | 0.4        | 6.4        | 8.1     | 4.4           | 2       | 2.4      | 0.8            | 163     | 82          | 37        | >1000          | 44      | 0.1             | 154    | 4.3       | 121      | 36         |
| 102       | 26.2    | 0.2        | 9.7        | 8.9     | 4.2           | 1.7     | 2.5      | 0.7            | 143     | 81          | 29        | >1000          | 43      | 0.1             | 156    | 4         | 122      | 39         |
| 103       | DEAD    | DEAD       | DEAD       | DEAD    | DEAD          | DEAD    | DEAD     | DEAD           | DEAD    | DEAD        | DEAD      | DEAD           | DEAD    | DEAD            | DEAD   | DEAD      | DEAD     | DEAD       |
| 104       | 24.7    | 0.6        | >15.0      | 11.5    | 5.1           | 2.3     | 2.8      | 0.8            | 170     | 110         | 66        | 842            | 63      | 0.1             | 156    | 11.8      | 123      | 13         |
| 105       | 21.8    | 0.2        | 7          | 8.5     | 3.9           | 1.7     | 2.2      | 0.8            | 143     | 72          | 40        | >1000          | 39      | 0.1             | 154    | 3.5       | 118      | 44         |
| Mean      | 24      | 0.4        | 7.7        | 9.3     | 4.4           | 1.9     | 2.5      | 0.8            | 154.8   | 86.3        | 43        | 842            | 47.3    | 0.1             | 155    | 5.9       | 121      | 33         |
| SD        | 1.9     | 0.2        | 1.8        | 1.5     | 0.5           | 0.3     | 0.3      | 0.1            | 13.9    | 16.5        | 16        | Not calculated | 10.7    | 0               | 1.2    | 3.9       | 2.2      | 13.7       |
| SEM       | 1       | 0.1        | 1          | 0.8     | 0.3           | 0.1     | 0.1      | 0              | 6.9     | 8.2         | 8         | Not calculated | 5.4     | 0               | 0.6    | 2         | 1.1      | 6.9        |
| N         | 4       | 4          | 3          | 4       | 4             | 4       | 4        | 4              | 4       | 4           | 4         | 4              | 4       | 4               | 4      | 4         | 4        | 4          |

**Table S45. Hematology parameters, group 20, female, tumor, test article cRGDY-PEG-cw800-C' dots at 1.2 nmol, day 14.**

| Animal No | BUN     | Creatinine | Phosphorus | Calcium | Total Protein | Albumin | Globulin | Alb/Glob Ratio | Glucose | Cholesterol | ALT (GPT) | AST (GOT)      | ALP     | Total Bilirubin | Sodium | Potassium | Chloride | Na/K Ratio |
|-----------|---------|------------|------------|---------|---------------|---------|----------|----------------|---------|-------------|-----------|----------------|---------|-----------------|--------|-----------|----------|------------|
|           | mg/dl   | mg/dl      | mg/dl      | mg/dl   | g/dl          | g/dl    | g/dl     | --             | mg/dl   | mg/dl       | U/L       | U/L            | U/L     | mg/dl           | mEq/L  | mEq/L     | mEq/L    | --         |
| 41.3-53.3 | 3.9-5.5 | 6.2-8.2    | 10.9-13.9  | 2.9-4.1 | 3.3-4.5       | 223-279 | 87-121   | 66-96          | 157-207 | 228-334     | 2.8-4.4   | 114-140        | 5.1-6.5 | 75-95           |        |           |          |            |
| 106       | 21.9    | 0.2        | 4.7        | 8.5     | 4.4           | 1.9     | 2.5      | 0.8            | 126     | 70          | 46        | >1000          | 46      | 0.5             | 154    | 4.6       | 121      | 33         |
| 107       | 23.1    | 0.2        | 7          | 7       | 4.1           | 1.9     | 2.2      | 0.8            | 217     | 117         | 51        | >1000          | 42      | 0.1             | 151    | 4.1       | 116      | 37         |
| 108       | DEAD    | DEAD       | DEAD       | DEAD    | DEAD          | DEAD    | DEAD     | DEAD           | DEAD    | DEAD        | DEAD      | DEAD           | DEAD    | DEAD            | DEAD   | DEAD      | DEAD     | DEAD       |
| 109       | 23.7    | 0.2        | 10.3       | 8.7     | 4.6           | 1.9     | 2.7      | 0.7            | 194     | 87          | 51        | >1000          | 40      | 0.1             | 154    | 4.2       | 120      | 37         |
| 110       | 25.7    | 0.2        | 10.9       | 7.9     | 4.2           | 1.8     | 2.4      | 0.8            | 173     | 94          | 61        | >1000          | 43      | 0.1             | 151    | 4.1       | 120      | 37         |
| Mean      | 23.6    | 0.2        | 8.2        | 8       | 4.3           | 1.9     | 2.5      | 0.8            | 177.5   | 92          | 52.3      | Not calculated | 42.6    | 0.2             | 152.5  | 4.3       | 119.3    | 36         |
| SD        | 1.6     | 0          | 2.9        | 0.8     | 0.2           | 0       | 0.2      | 0.1            | 38.8    | 19.5        | 6.3       | Not calculated | 2.5     | 0.2             | 1.7    | 0.2       | 2.2      | 2          |
| SEM       | 0.8     | 0          | 1.5        | 0.4     | 0.1           | 0       | 0.1      | 0              | 19.4    | 9.7         | 3.1       | Not calculated | 1.3     | 0.1             | 0.9    | 0.1       | 1.1      | 1          |
| N         | 4       | 4          | 4          | 4       | 4             | 4       | 4        | 4              | 4       | 4           | 4         | 4.0            | 4       | 4               | 4      | 4         | 4        | 4          |
